# Supplementary material
Source: publisher site journal article supplement (https://www.dovepress.com/article/615081)
Supplement: Supplementary file 1 [file 615081%20Supplementary%20Material.docx]

**
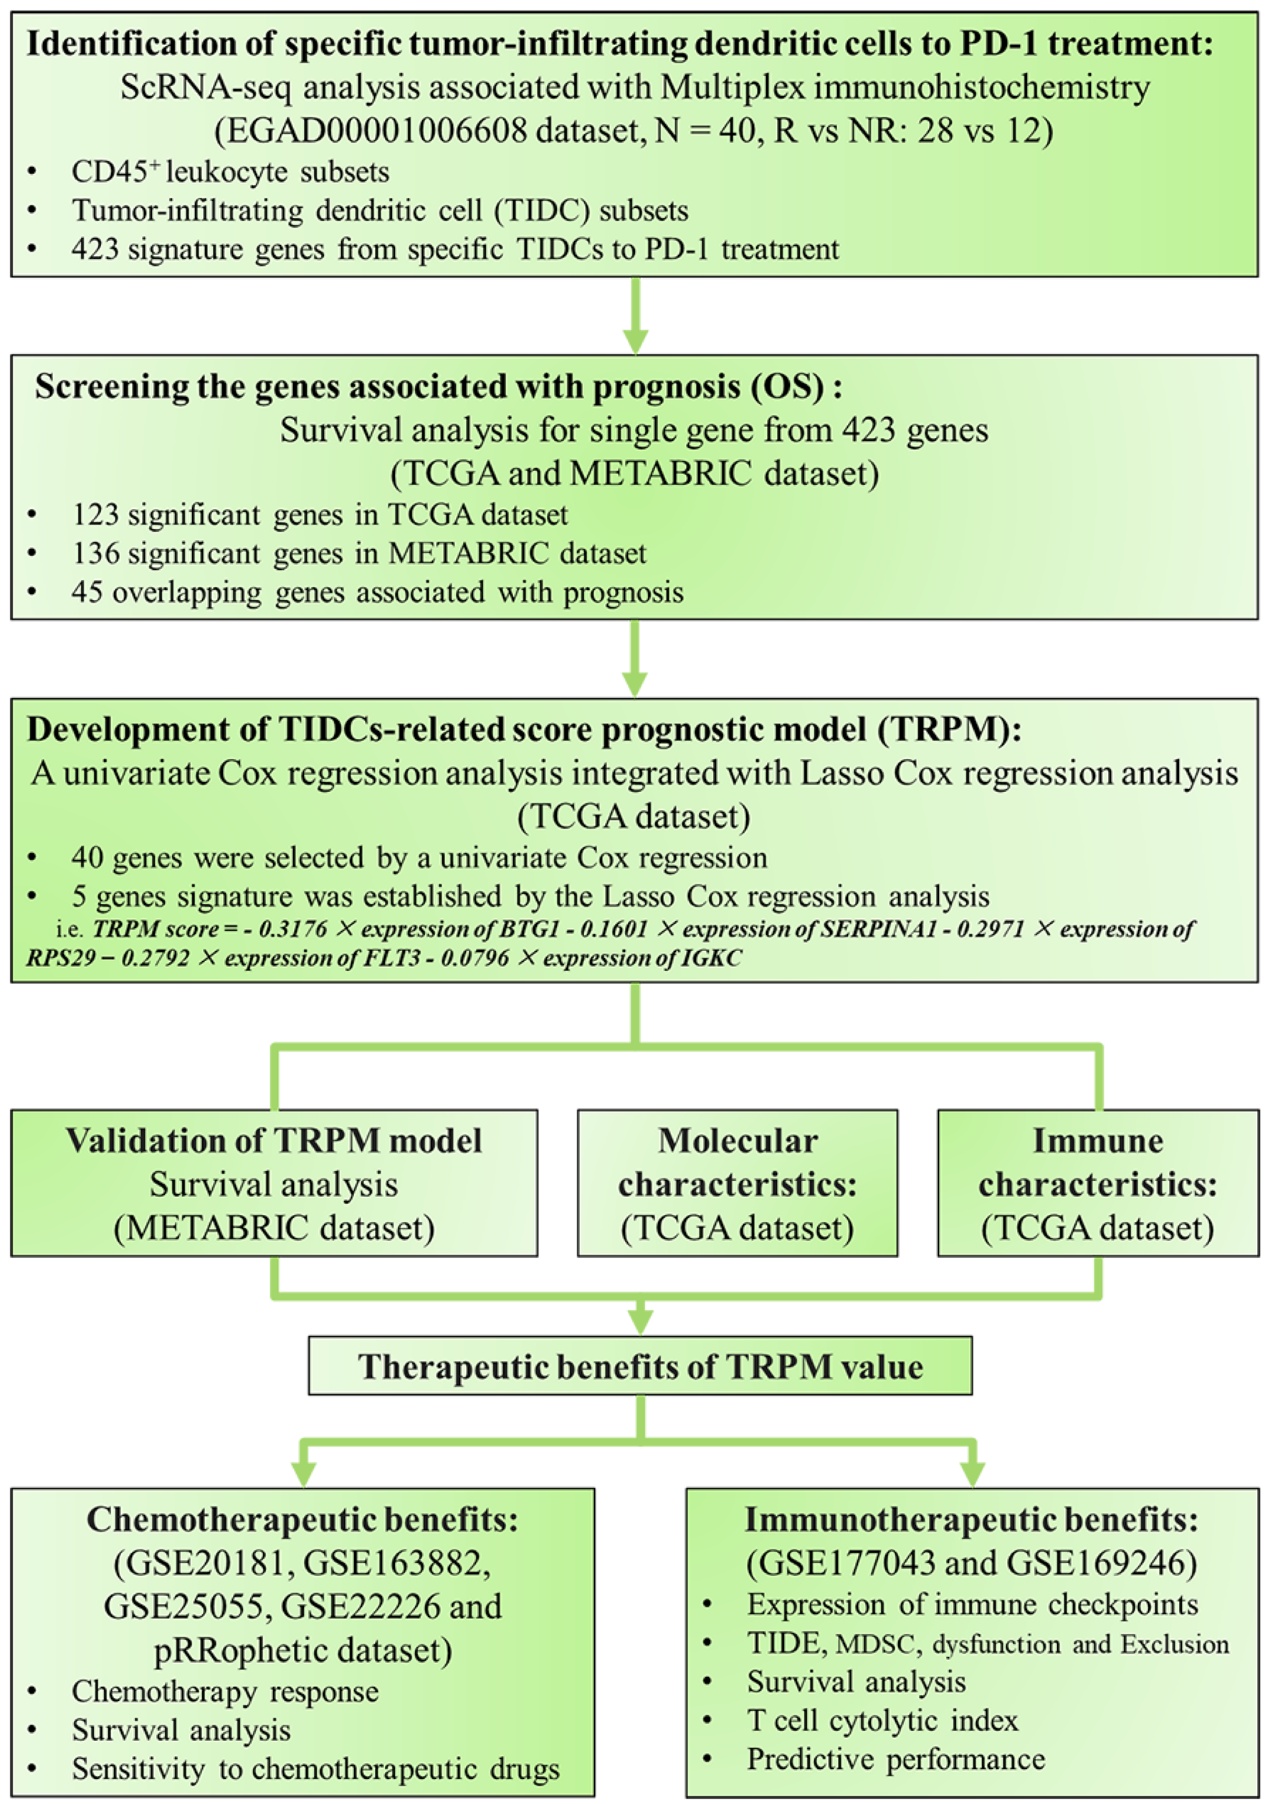
**

**Supplementary Figure 1. Workflow of the present study.**

**
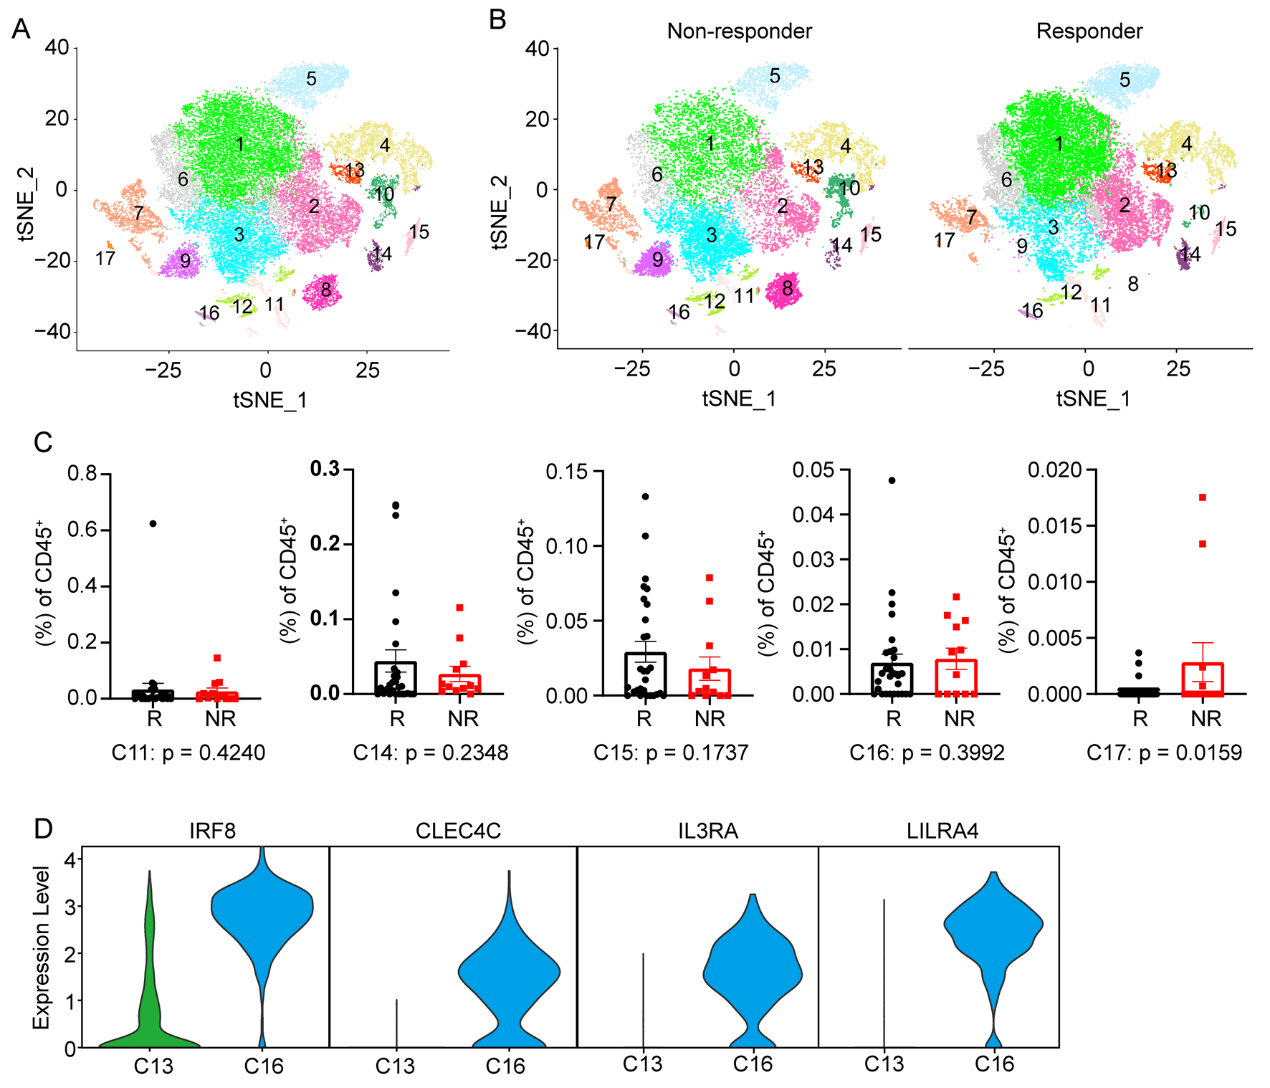
**

**Supplementary Figure 2. Identification of DC subset overrepresented in responding breast cancer.** **(A)** t-distribution stochastic neighbour embedding (t-SNE) plot of immune cells. (**B**) t-SNE plot of intratumoral immune cells that were classified into 17 clusters from the two groups of breast cancer samples of distinct immunotherapy outcomes (non-responder group versus responder group). (**C**) Comparison of the cell cluster percentage changes between the non-responder and responder groups. (**D**) Violin plots showing the normalized expression levels of representative canonical marker genes.


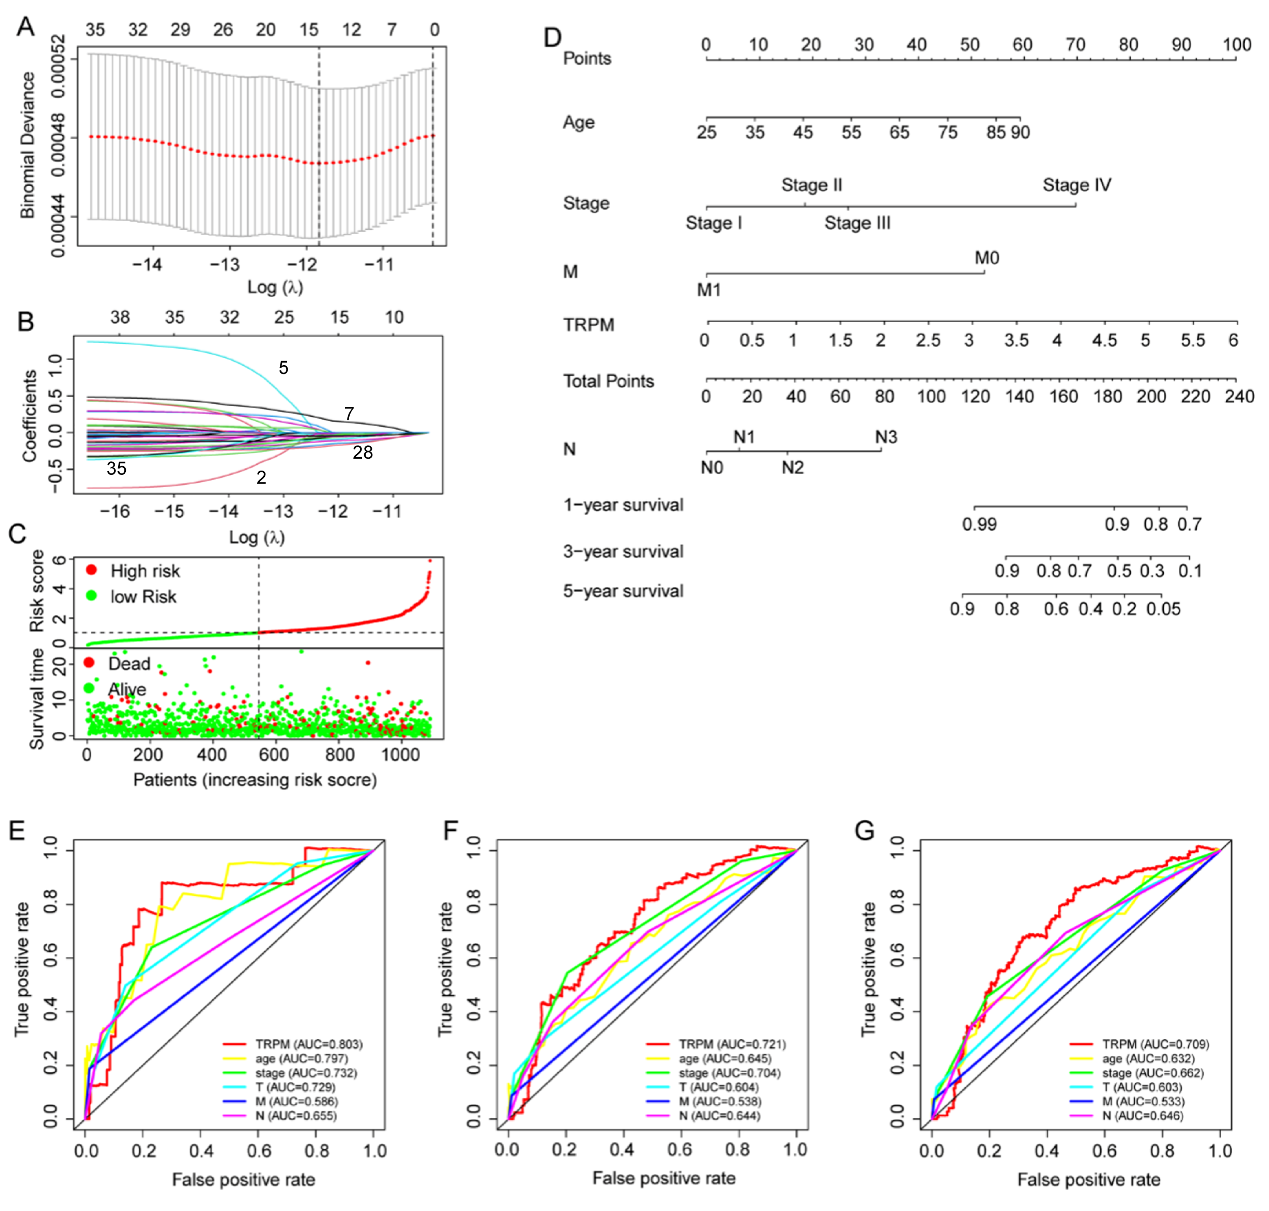


**Supplementary Figure 3. Nomogram developed for predicting the probability of 1-, 3- and 5-year overall survival in the training cohort.** (**A-B**) The LASSO regression analysis and partial likelihood deviance on the prognostic genes. (**C**) The ranked dot plot of the TRPM score distribution and scatter plot of the patients’ survival status. (**D**) The nomogram was constructed in the training cohort with the TRPM. (**E-G**) ROC curves to predict the sensitivity and specificity of 1-, 3-, and 5-year survival according to the TRPM score.


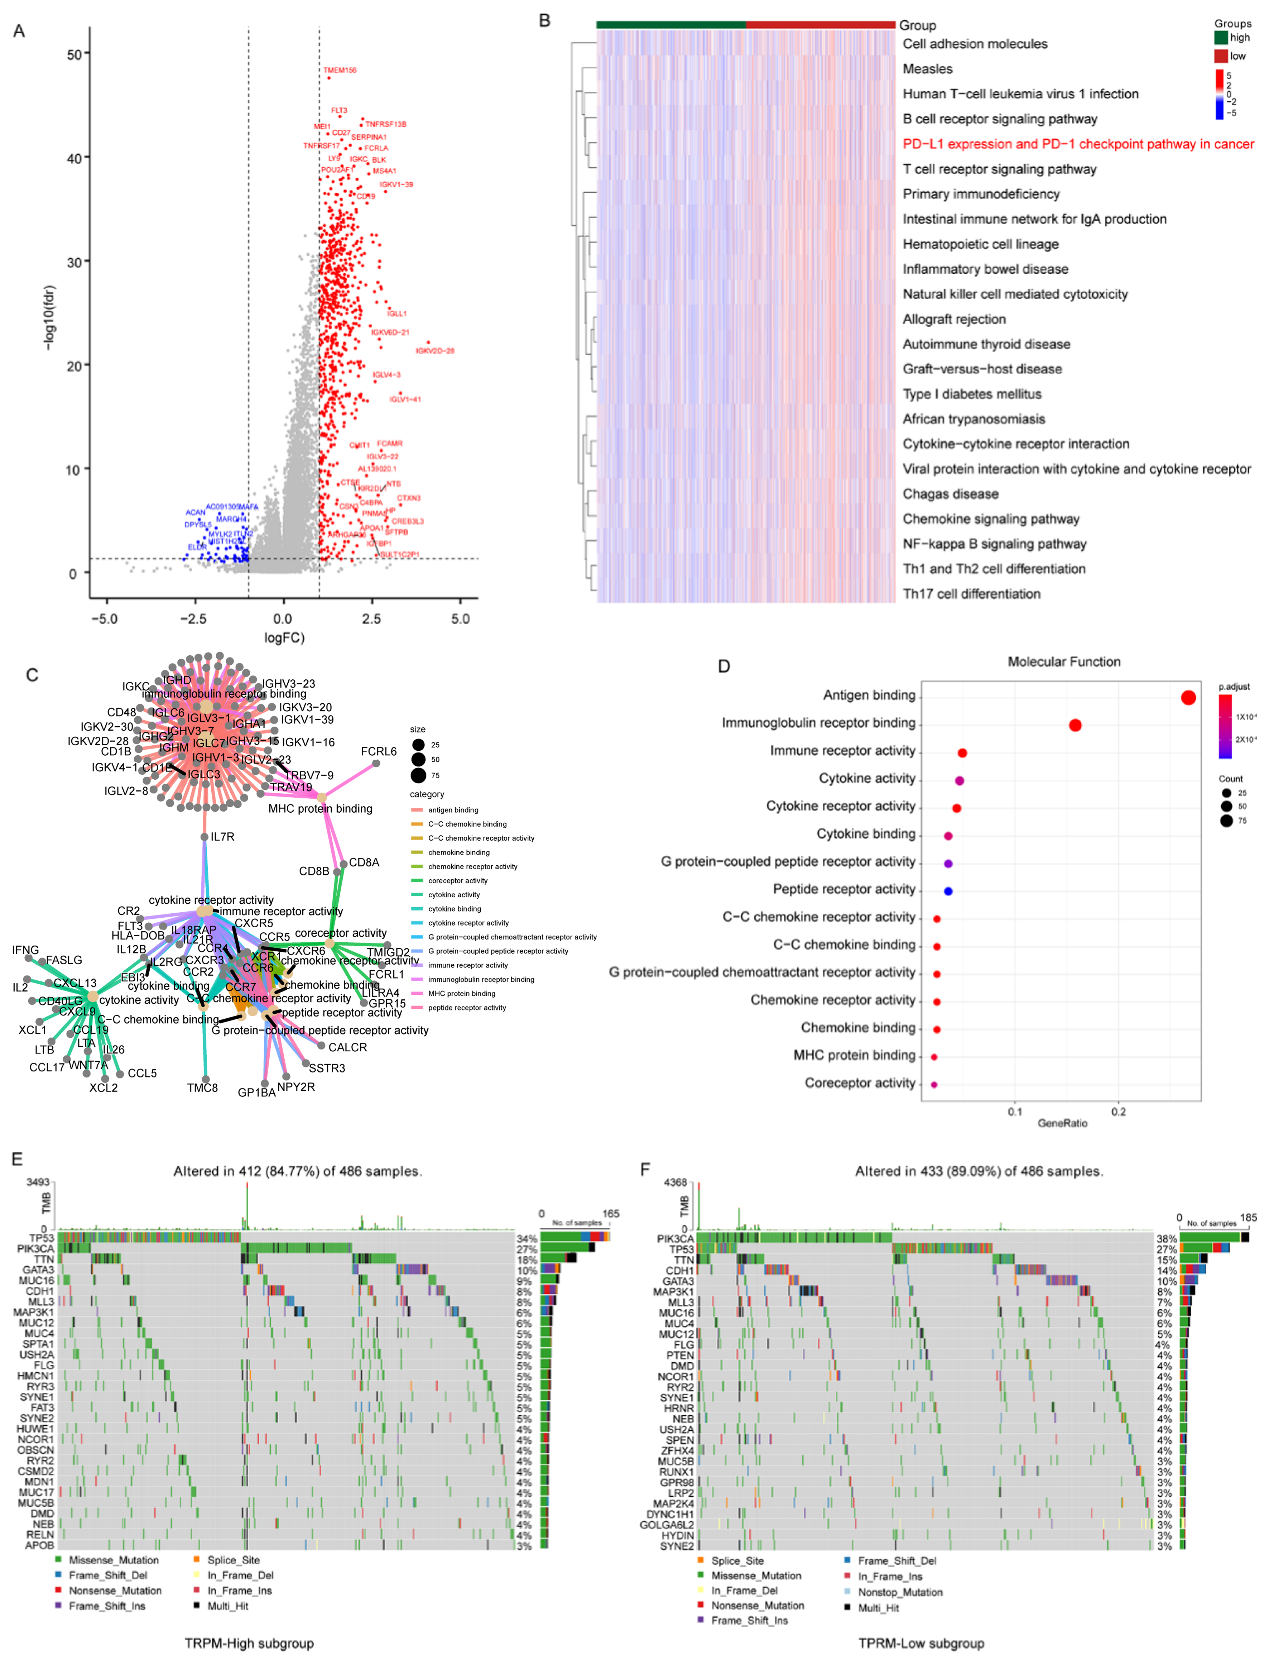


**Supplementary Figure 4. Molecular characteristics of different TRPM subgroups.** (**A**) Volcano plot showing differentially expressed genes (DEGs) between high and low TRPM subgroups. (**B**) GSVA analysis of biological pathways between two different TRPM subgroups. (**C**-**D**) The result of GO analysis in molecular function. (**E-F**) The waterfall plot showing significantly mutated genes in the breast cancer samples of different TRPM subgroups.

**
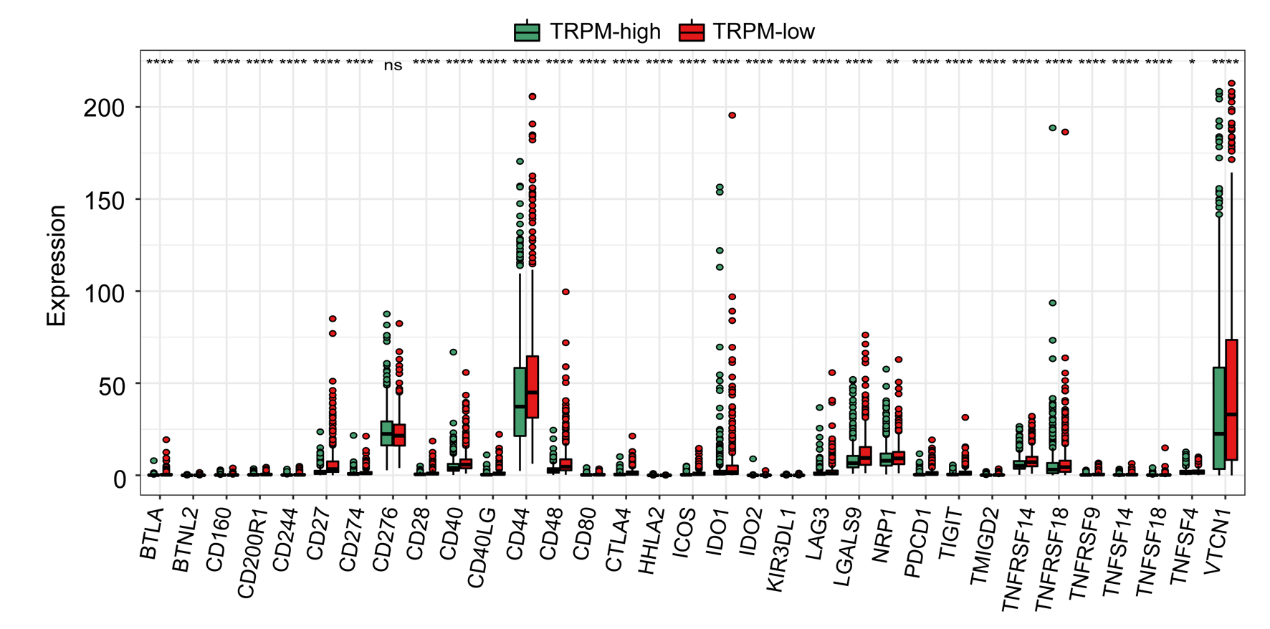
**

**Supplementary Figure 5. The expression of immune checkpoints in two TRPM subgroups.** Comparison of the expression levels of immune checkpoint genes between the high- and low-TRPM subgroups, including PDCD1, TIGIT, LAG3, and other representative immune checkpoint molecules. ns, not significant; *p < 0.05; **p < 0.01; **p < 0.0001; determined by unpaired t test.

| **Table.S1. The website summary of all R packages used in the study.** | |
| --- | --- |
| **R packages** | **URL link** |
| barplot3d | https://cran.r-project.org/web/packages/barplot3d/index.html |
| CIBERSORT | https://rdrr.io/github/singha53/amritr/src/R/supportFunc_cibersort.R |
| clusterProfiler | http://www.bioconductor.org/packages/release/bioc/html/clusterProfiler.html |
| dplyr | https://CRAN.R-project.org/package=dplyr |
| e1071 | https://cran.r-project.org/web/packages/e1071/index.html |
| estimate | https://r-forge.r-project.org/projects/estimate/ |
| GenVisR | http://www.bioconductor.org/packages/release/bioc/html/GenVisR.html |
| GEOquery | http://www.bioconductor.org/packages/release/bioc/html/GEOquery.html |
| ggplot2 | https://ggplot2.tidyverse.org/ |
| ggpubr | https://CRAN.R-project.org/package=ggpubr |
| ggrepel | https://CRAN.R-project.org/package=ggrepel |
| glmnet | https://CRAN.R-project.org/package=glmnet |
| GSVA | http://www.bioconductor.org/packages/devel/bioc/ vignettes/GSVA/inst/doc/GSVA.html |
| limma | http://www.bioconductor.org/packages/release/bioc/html/limma.html |
| maftools | http://www.bioconductor.org/packages/release/bioc/html/maftools.html |
| mclust | https://cran.r-project.org/web/packages/mclust/index.html  and https://github.com/mojaveazure/seurat-object |
| msigdbr | https://CRAN.R-project.org/package=msigdbr |
| NMF | https://cran.r-project.org/web/packages/NMF/index.html |
| openxlsx | https://cran.r-project.org/web/packages/openxlsx/index.html |
| org.Hs.eg.db | http://bioconductor.riken.jp/packages/3.0/data/annotation/html/org.Hs.eg.db.html |
| patchwork | https://CRAN.R-project.org/package=patchwork |
| pheatmap | https://CRAN.R-project.org/package=pheatmap |
| pROC | https://cran.r-project.org/web/packages/pROC/index.html |
| pRRophetic | https://osf.io/5xvsg/wiki/home/ |
| RColorBrewer | https://CRAN.R-project.org/package=RColorBrewer |
| rms | https://cran.r-project.org/web/packages/rms/index.html |
| Seurat | https://satijalab.org/seurat |
| stringr | https://cran.r-project.org/web/packages/stringr/index.html |
| survival | https://cran.r-project.org/web/packages/survival/index.html |
| survivalROC | https://CRAN.R-project.org/package=survivalROC |
| survminer | https://CRAN.R-project.org/package=survminer |
| tibble | https://cran.r-project.org/web/packages/tibble/index.html |
| tidyverse | https://github.com/tidyverse/tidyverse |

| **Table S2. The gene signature of cluster 13 (CD1C+CLEC10A+)** | | | | | |  |
| --- | --- | --- | --- | --- | --- | --- |
| gene | avg_log2FC | pct.1 | pct.2 | p_val | p_val_adj | cluster |
| IGKC | -3.426997 | 0.177 | 0.268 | 1.10E-09 | 2.49E-05 | 13 |
| CCL5 | -3.208685 | 0.144 | 0.502 | 5.54E-73 | 1.25E-68 | 13 |
| NKG7 | -2.674956 | 0.11 | 0.376 | 7.62E-45 | 1.72E-40 | 13 |
| IL32 | -2.639315 | 0.217 | 0.669 | 1.68E-115 | 3.80E-111 | 13 |
| CD3E | -2.619994 | 0.098 | 0.643 | 6.30E-136 | 1.42E-131 | 13 |
| GZMA | -2.396529 | 0.035 | 0.373 | 8.45E-61 | 1.91E-56 | 13 |
| CD7 | -2.305331 | 0.116 | 0.467 | 2.84E-68 | 6.41E-64 | 13 |
| CD3D | -2.271328 | 0.074 | 0.554 | 2.43E-107 | 5.48E-103 | 13 |
| GZMK | -2.154821 | 0.032 | 0.262 | 2.27E-36 | 5.13E-32 | 13 |
| IFITM1 | -2.136753 | 0.42 | 0.809 | 5.13E-131 | 1.16E-126 | 13 |
| CCL4 | -2.063043 | 0.235 | 0.341 | 5.54E-13 | 1.25E-08 | 13 |
| CD8A | -1.971765 | 0.044 | 0.274 | 3.21E-36 | 7.25E-32 | 13 |
| CD2 | -1.909324 | 0.243 | 0.561 | 1.50E-72 | 3.38E-68 | 13 |
| TRBC2 | -1.862715 | 0.065 | 0.492 | 1.36E-86 | 3.07E-82 | 13 |
| CTSW | -1.778679 | 0.107 | 0.362 | 1.73E-42 | 3.90E-38 | 13 |
| LCK | -1.714803 | 0.07 | 0.487 | 1.32E-83 | 2.98E-79 | 13 |
| PTPRCAP | -1.594154 | 0.056 | 0.406 | 1.41E-64 | 3.19E-60 | 13 |
| TRAC | -1.561841 | 0.058 | 0.4 | 8.74E-62 | 1.97E-57 | 13 |
| CD27 | -1.545854 | 0.037 | 0.39 | 5.37E-64 | 1.21E-59 | 13 |
| TRBC1 | -1.545061 | 0.047 | 0.359 | 5.96E-53 | 1.34E-48 | 13 |
| RAC2 | -1.542311 | 0.517 | 0.771 | 1.29E-100 | 2.90E-96 | 13 |
| CD69 | -1.513948 | 0.315 | 0.521 | 1.03E-40 | 2.32E-36 | 13 |
| CTSD | -1.48994 | 0.315 | 0.432 | 8.10E-20 | 1.83E-15 | 13 |
| 1-Sep | -1.475881 | 0.121 | 0.478 | 2.19E-69 | 4.95E-65 | 13 |
| CD52 | -1.468403 | 0.604 | 0.778 | 5.60E-78 | 1.26E-73 | 13 |
| LAT | -1.443434 | 0.086 | 0.43 | 7.39E-62 | 1.67E-57 | 13 |
| EVL | -1.371754 | 0.532 | 0.652 | 2.65E-55 | 5.99E-51 | 13 |
| SPOCK2 | -1.368136 | 0.079 | 0.38 | 2.83E-50 | 6.38E-46 | 13 |
| CD3G | -1.363684 | 0.068 | 0.386 | 1.57E-54 | 3.53E-50 | 13 |
| TBC1D10C | -1.34144 | 0.186 | 0.464 | 2.24E-53 | 5.06E-49 | 13 |
| CD99 | -1.335885 | 0.503 | 0.712 | 1.22E-74 | 2.76E-70 | 13 |
| SLC9A3R1 | -1.324279 | 0.245 | 0.493 | 4.90E-50 | 1.11E-45 | 13 |
| GZMM | -1.32209 | 0.023 | 0.295 | 8.84E-46 | 1.99E-41 | 13 |
| CD247 | -1.308019 | 0.044 | 0.344 | 4.47E-51 | 1.01E-46 | 13 |
| LTB | -1.301082 | 0.371 | 0.52 | 1.12E-29 | 2.52E-25 | 13 |
| ISG20 | -1.274055 | 0.257 | 0.538 | 4.27E-49 | 9.64E-45 | 13 |
| STK17A | -1.265176 | 0.298 | 0.519 | 2.67E-46 | 6.02E-42 | 13 |
| IL2RB | -1.253524 | 0.037 | 0.291 | 1.21E-40 | 2.72E-36 | 13 |
| ITM2A | -1.242612 | 0.047 | 0.307 | 2.58E-41 | 5.83E-37 | 13 |
| CXCR4 | -1.241562 | 0.429 | 0.545 | 7.49E-27 | 1.69E-22 | 13 |
| GIMAP7 | -1.24092 | 0.203 | 0.416 | 3.55E-35 | 8.02E-31 | 13 |
| SKAP1 | -1.217724 | 0.049 | 0.341 | 4.80E-49 | 1.08E-44 | 13 |
| MT2A | -1.216561 | 0.452 | 0.551 | 3.55E-22 | 8.01E-18 | 13 |
| ZAP70 | -1.212003 | 0.025 | 0.334 | 2.36E-53 | 5.33E-49 | 13 |
| LBH | -1.207002 | 0.074 | 0.372 | 1.23E-48 | 2.78E-44 | 13 |
| RARRES3 | -1.206347 | 0.406 | 0.593 | 9.44E-44 | 2.13E-39 | 13 |
| CXCR3 | -1.202149 | 0.133 | 0.337 | 3.50E-31 | 7.90E-27 | 13 |
| CD96 | -1.193847 | 0.053 | 0.315 | 1.61E-42 | 3.63E-38 | 13 |
| IL7R | -1.185981 | 0.229 | 0.39 | 3.10E-20 | 7.00E-16 | 13 |
| C12orf57 | -1.167456 | 0.44 | 0.625 | 1.00E-49 | 2.26E-45 | 13 |
| OCIAD2 | -1.152644 | 0.123 | 0.395 | 3.17E-46 | 7.15E-42 | 13 |
| HLA-E | -1.144814 | 0.835 | 0.92 | 4.47E-110 | 1.01E-105 | 13 |
| RHOH | -1.14301 | 0.096 | 0.367 | 3.45E-44 | 7.80E-40 | 13 |
| ACAP1 | -1.141851 | 0.322 | 0.496 | 1.36E-37 | 3.08E-33 | 13 |
| FCMR | -1.135418 | 0.044 | 0.29 | 7.08E-39 | 1.60E-34 | 13 |
| TSC22D3 | -1.116598 | 0.525 | 0.633 | 2.65E-30 | 5.98E-26 | 13 |
| XBP1 | -1.115988 | 0.394 | 0.408 | 2.98E-08 | 0.0006725 | 13 |
| DDIT4 | -1.084166 | 0.275 | 0.471 | 6.89E-32 | 1.55E-27 | 13 |
| SIT1 | -1.083585 | 0.049 | 0.303 | 1.06E-40 | 2.38E-36 | 13 |
| GIMAP4 | -1.071408 | 0.298 | 0.456 | 2.18E-28 | 4.92E-24 | 13 |
| SYNE2 | -1.061868 | 0.067 | 0.304 | 5.09E-36 | 1.15E-31 | 13 |
| CLEC2D | -1.059517 | 0.121 | 0.332 | 2.02E-31 | 4.55E-27 | 13 |
| SH2D2A | -1.0536 | 0.037 | 0.256 | 1.00E-33 | 2.26E-29 | 13 |
| CD82 | -1.033685 | 0.086 | 0.325 | 5.86E-37 | 1.32E-32 | 13 |
| IFI6 | -1.031328 | 0.354 | 0.431 | 2.95E-11 | 6.65E-07 | 13 |
| CST7 | -1.030708 | 0.401 | 0.437 | 8.58E-10 | 1.94E-05 | 13 |
| IKZF3 | -1.023812 | 0.044 | 0.28 | 2.33E-36 | 5.27E-32 | 13 |
| TC2N | -1.023139 | 0.058 | 0.262 | 2.00E-29 | 4.52E-25 | 13 |
| KIAA1551 | -1.019897 | 0.319 | 0.438 | 1.25E-22 | 2.81E-18 | 13 |
| LY6E | -1.019294 | 0.581 | 0.684 | 1.74E-32 | 3.93E-28 | 13 |
| TUBA4A | -1.017759 | 0.095 | 0.333 | 6.42E-37 | 1.45E-32 | 13 |
| ZFP36L2 | -1.002587 | 0.662 | 0.806 | 1.15E-36 | 2.58E-32 | 13 |
| CD6 | -0.99719 | 0.081 | 0.289 | 4.56E-30 | 1.03E-25 | 13 |
| TRAF3IP3 | -0.996121 | 0.347 | 0.472 | 3.63E-26 | 8.19E-22 | 13 |
| DENND2D | -0.991063 | 0.11 | 0.326 | 3.06E-32 | 6.90E-28 | 13 |
| IL2RG | -0.968946 | 0.468 | 0.565 | 1.30E-23 | 2.94E-19 | 13 |
| GYPC | -0.967897 | 0.306 | 0.497 | 1.25E-34 | 2.82E-30 | 13 |
| PRKCH | -0.963902 | 0.093 | 0.288 | 2.08E-28 | 4.69E-24 | 13 |
| FYN | -0.958691 | 0.165 | 0.306 | 9.52E-20 | 2.15E-15 | 13 |
| ARHGEF1 | -0.94686 | 0.366 | 0.457 | 3.68E-21 | 8.30E-17 | 13 |
| PTPRC | -0.936751 | 0.715 | 0.775 | 7.93E-41 | 1.79E-36 | 13 |
| PPP2R5C | -0.933864 | 0.194 | 0.335 | 8.87E-20 | 2.00E-15 | 13 |
| PTPN7 | -0.931321 | 0.249 | 0.35 | 8.98E-16 | 2.03E-11 | 13 |
| ETS1 | -0.93087 | 0.07 | 0.275 | 1.71E-30 | 3.85E-26 | 13 |
| HCST | -0.908036 | 0.632 | 0.688 | 5.76E-28 | 1.30E-23 | 13 |
| RNF213 | -0.8987 | 0.485 | 0.56 | 3.74E-21 | 8.43E-17 | 13 |
| BTG1 | -0.89124 | 0.734 | 0.846 | 2.43E-51 | 5.49E-47 | 13 |
| DNAJB1 | -0.883393 | 0.327 | 0.402 | 1.30E-12 | 2.94E-08 | 13 |
| SHISA5 | -0.878807 | 0.391 | 0.478 | 4.59E-21 | 1.04E-16 | 13 |
| OPTN | -0.87646 | 0.098 | 0.312 | 1.40E-30 | 3.16E-26 | 13 |
| SLFN5 | -0.867577 | 0.222 | 0.328 | 8.37E-15 | 1.89E-10 | 13 |
| PDCD4 | -0.865263 | 0.277 | 0.396 | 7.91E-19 | 1.79E-14 | 13 |
| ISG15 | -0.854237 | 0.391 | 0.439 | 9.80E-08 | 0.0022113 | 13 |
| PARP8 | -0.850341 | 0.144 | 0.263 | 3.25E-15 | 7.33E-11 | 13 |
| APOBEC3G | -0.846087 | 0.287 | 0.35 | 1.33E-09 | 3.00E-05 | 13 |
| GNG2 | -0.843744 | 0.173 | 0.304 | 1.10E-17 | 2.48E-13 | 13 |
| AES | -0.834357 | 0.375 | 0.436 | 1.27E-14 | 2.86E-10 | 13 |
| IFI44L | -0.829241 | 0.154 | 0.255 | 1.38E-10 | 3.12E-06 | 13 |
| FLT3LG | -0.822531 | 0.091 | 0.251 | 2.79E-21 | 6.29E-17 | 13 |
| EMB | -0.818942 | 0.305 | 0.369 | 4.30E-12 | 9.69E-08 | 13 |
| MT1X | -0.809607 | 0.193 | 0.261 | 6.87E-08 | 0.0015494 | 13 |
| RASAL3 | -0.807283 | 0.182 | 0.298 | 1.01E-15 | 2.28E-11 | 13 |
| TMC8 | -0.798673 | 0.184 | 0.317 | 5.63E-18 | 1.27E-13 | 13 |
| SARAF | -0.793795 | 0.788 | 0.838 | 3.02E-38 | 6.81E-34 | 13 |
| HIST1H4C | -0.786998 | 0.455 | 0.452 | 4.17E-07 | 0.009413 | 13 |
| SOD1 | -0.782834 | 0.55 | 0.604 | 3.29E-24 | 7.42E-20 | 13 |
| C19orf66 | -0.775158 | 0.292 | 0.377 | 2.04E-13 | 4.60E-09 | 13 |
| EML4 | -0.759658 | 0.326 | 0.408 | 2.27E-14 | 5.12E-10 | 13 |
| ARHGAP15 | -0.756734 | 0.329 | 0.382 | 1.87E-10 | 4.23E-06 | 13 |
| LEPROTL1 | -0.754122 | 0.443 | 0.45 | 4.67E-10 | 1.05E-05 | 13 |
| HLA-A | -0.752084 | 0.932 | 0.961 | 2.00E-55 | 4.51E-51 | 13 |
| SUN2 | -0.749626 | 0.196 | 0.293 | 1.48E-12 | 3.33E-08 | 13 |
| RBL2 | -0.736017 | 0.242 | 0.307 | 2.04E-09 | 4.61E-05 | 13 |
| PIM1 | -0.731608 | 0.149 | 0.276 | 4.69E-15 | 1.06E-10 | 13 |
| SMCHD1 | -0.728631 | 0.32 | 0.38 | 2.76E-10 | 6.22E-06 | 13 |
| AAK1 | -0.722345 | 0.151 | 0.277 | 1.13E-15 | 2.56E-11 | 13 |
| PIM2 | -0.720537 | 0.177 | 0.257 | 1.06E-08 | 0.0002401 | 13 |
| SELENOM | -0.706528 | 0.158 | 0.267 | 9.03E-14 | 2.04E-09 | 13 |
| BTN3A2 | -0.699854 | 0.168 | 0.273 | 1.34E-12 | 3.03E-08 | 13 |
| PHF1 | -0.691919 | 0.124 | 0.258 | 1.07E-16 | 2.42E-12 | 13 |
| CORO1A | -0.687085 | 0.772 | 0.794 | 3.68E-28 | 8.30E-24 | 13 |
| MALAT1 | -0.686709 | 0.895 | 0.977 | 6.77E-74 | 1.53E-69 | 13 |
| RABAC1 | -0.686233 | 0.408 | 0.464 | 6.40E-14 | 1.44E-09 | 13 |
| CHST12 | -0.676851 | 0.191 | 0.268 | 3.80E-09 | 8.57E-05 | 13 |
| GBP5 | -0.675771 | 0.198 | 0.299 | 5.70E-11 | 1.29E-06 | 13 |
| ARHGAP9 | -0.671876 | 0.324 | 0.356 | 2.20E-07 | 0.0049739 | 13 |
| CCND3 | -0.668821 | 0.382 | 0.427 | 6.73E-11 | 1.52E-06 | 13 |
| SLC38A1 | -0.659678 | 0.238 | 0.311 | 8.65E-10 | 1.95E-05 | 13 |
| CALM1 | -0.659106 | 0.769 | 0.816 | 4.94E-33 | 1.11E-28 | 13 |
| B2M | -0.65866 | 0.991 | 0.994 | 2.13E-92 | 4.81E-88 | 13 |
| SP100 | -0.656623 | 0.515 | 0.496 | 2.10E-08 | 0.0004747 | 13 |
| ZC3HAV1 | -0.654645 | 0.242 | 0.318 | 6.60E-10 | 1.49E-05 | 13 |
| RPS27 | -0.65095 | 0.996 | 0.988 | 5.48E-47 | 1.24E-42 | 13 |
| TSTD1 | -0.627287 | 0.352 | 0.399 | 8.34E-10 | 1.88E-05 | 13 |
| PAXX | -0.618955 | 0.58 | 0.531 | 1.22E-07 | 0.0027466 | 13 |
| DDX24 | -0.61731 | 0.431 | 0.454 | 1.68E-09 | 3.79E-05 | 13 |
| BIN2 | -0.615767 | 0.25 | 0.325 | 9.44E-10 | 2.13E-05 | 13 |
| ANAPC16 | -0.615762 | 0.564 | 0.565 | 1.76E-13 | 3.98E-09 | 13 |
| PPP3CC | -0.615425 | 0.173 | 0.258 | 8.52E-10 | 1.92E-05 | 13 |
| EZR | -0.611827 | 0.427 | 0.453 | 3.42E-08 | 0.0007723 | 13 |
| KMT2E | -0.606137 | 0.506 | 0.478 | 7.52E-07 | 0.0169698 | 13 |
| ALOX5AP | -0.599772 | 0.413 | 0.483 | 1.82E-10 | 4.11E-06 | 13 |
| LCP2 | -0.59877 | 0.504 | 0.49 | 4.38E-08 | 0.000989 | 13 |
| JUN | -0.594244 | 0.545 | 0.565 | 9.63E-07 | 0.0217287 | 13 |
| PLP2 | -0.592115 | 0.499 | 0.511 | 1.01E-09 | 2.27E-05 | 13 |
| KRT10 | -0.588463 | 0.433 | 0.447 | 1.88E-09 | 4.24E-05 | 13 |
| CUTA | -0.587202 | 0.503 | 0.504 | 1.31E-10 | 2.95E-06 | 13 |
| BUB3 | -0.573378 | 0.324 | 0.369 | 3.45E-08 | 0.0007788 | 13 |
| TPST2 | -0.57329 | 0.189 | 0.253 | 1.54E-07 | 0.0034672 | 13 |
| TECR | -0.568145 | 0.371 | 0.4 | 8.03E-08 | 0.001813 | 13 |
| LAMP1 | -0.564778 | 0.221 | 0.296 | 4.10E-09 | 9.26E-05 | 13 |
| HLA-C | -0.562965 | 0.94 | 0.973 | 1.44E-48 | 3.26E-44 | 13 |
| HLA-B | -0.554671 | 0.956 | 0.978 | 5.63E-46 | 1.27E-41 | 13 |
| 9-Sep | -0.551459 | 0.499 | 0.507 | 1.03E-08 | 0.0002314 | 13 |
| SEC62 | -0.548637 | 0.506 | 0.471 | 7.93E-07 | 0.0179043 | 13 |
| ANKRD12 | -0.54797 | 0.536 | 0.519 | 1.52E-07 | 0.0034307 | 13 |
| SPCS2 | -0.546511 | 0.422 | 0.414 | 1.60E-06 | 0.0360714 | 13 |
| WIPF1 | -0.544281 | 0.497 | 0.493 | 9.73E-08 | 0.0021948 | 13 |
| FYB1 | -0.54418 | 0.599 | 0.602 | 9.61E-10 | 2.17E-05 | 13 |
| ICAM3 | -0.532316 | 0.424 | 0.447 | 7.85E-08 | 0.0017711 | 13 |
| SRSF7 | -0.530921 | 0.625 | 0.607 | 1.82E-09 | 4.10E-05 | 13 |
| PPDPF | -0.523806 | 0.879 | 0.85 | 1.34E-18 | 3.02E-14 | 13 |
| RPS29 | -0.517538 | 0.937 | 0.936 | 2.67E-17 | 6.03E-13 | 13 |
| EIF4A2 | -0.515372 | 0.592 | 0.57 | 6.32E-09 | 0.0001426 | 13 |
| FUS | -0.509803 | 0.65 | 0.621 | 1.27E-09 | 2.87E-05 | 13 |
| SCIMP | 0.5035474 | 0.366 | 0.064 | 2.00E-168 | 4.52E-164 | 13 |
| LMNA | 0.5057517 | 0.359 | 0.179 | 5.25E-27 | 1.18E-22 | 13 |
| RAB7A | 0.5067881 | 0.685 | 0.364 | 7.30E-44 | 1.65E-39 | 13 |
| ARF5 | 0.5079743 | 0.75 | 0.481 | 3.71E-36 | 8.36E-32 | 13 |
| PILRA | 0.5096648 | 0.333 | 0.076 | 1.80E-104 | 4.07E-100 | 13 |
| PLEKHO1 | 0.5103657 | 0.473 | 0.149 | 1.31E-87 | 2.96E-83 | 13 |
| PTAFR | 0.510946 | 0.34 | 0.069 | 4.37E-131 | 9.87E-127 | 13 |
| NAGK | 0.5113609 | 0.48 | 0.175 | 7.69E-70 | 1.74E-65 | 13 |
| SAT1 | 0.51201 | 0.841 | 0.556 | 2.01E-62 | 4.54E-58 | 13 |
| FBP1 | 0.5162687 | 0.368 | 0.073 | 2.67E-142 | 6.03E-138 | 13 |
| TNFAIP8L2 | 0.516481 | 0.392 | 0.075 | 7.46E-160 | 1.68E-155 | 13 |
| SLC25A3 | 0.5171123 | 0.813 | 0.607 | 5.62E-29 | 1.27E-24 | 13 |
| MYD88 | 0.5174426 | 0.529 | 0.196 | 1.33E-72 | 2.99E-68 | 13 |
| ETV6 | 0.5189286 | 0.392 | 0.102 | 3.24E-104 | 7.32E-100 | 13 |
| GADD45B | 0.5198207 | 0.56 | 0.342 | 3.50E-26 | 7.91E-22 | 13 |
| RASSF2 | 0.5204489 | 0.403 | 0.115 | 3.51E-90 | 7.92E-86 | 13 |
| MFSD1 | 0.5226274 | 0.56 | 0.199 | 8.98E-82 | 2.03E-77 | 13 |
| CMTM6 | 0.5231513 | 0.636 | 0.331 | 1.32E-44 | 2.98E-40 | 13 |
| ZYX | 0.5241067 | 0.755 | 0.47 | 6.38E-33 | 1.44E-28 | 13 |
| FAM49A | 0.5250456 | 0.319 | 0.068 | 9.89E-114 | 2.23E-109 | 13 |
| CAPG | 0.5261374 | 0.697 | 0.34 | 1.20E-51 | 2.72E-47 | 13 |
| MGST2 | 0.5261501 | 0.398 | 0.082 | 2.40E-148 | 5.43E-144 | 13 |
| KCNK6 | 0.5272108 | 0.415 | 0.095 | 3.36E-136 | 7.59E-132 | 13 |
| RPS24 | 0.5286283 | 0.996 | 0.982 | 7.02E-79 | 1.58E-74 | 13 |
| SUPT4H1 | 0.528645 | 0.601 | 0.265 | 3.99E-58 | 9.01E-54 | 13 |
| KDM2B | 0.5290283 | 0.34 | 0.104 | 4.08E-67 | 9.21E-63 | 13 |
| LYN | 0.5299552 | 0.448 | 0.115 | 1.75E-116 | 3.94E-112 | 13 |
| MYCL | 0.5304726 | 0.282 | 0.015 | 0 | 0 | 13 |
| P2RY6 | 0.5313805 | 0.322 | 0.043 | 7.51E-215 | 1.69E-210 | 13 |
| CD68 | 0.5331383 | 0.623 | 0.157 | 3.39E-160 | 7.65E-156 | 13 |
| MEF2C | 0.5367335 | 0.515 | 0.159 | 2.00E-103 | 4.51E-99 | 13 |
| ATP2B1-AS1 | 0.5369776 | 0.413 | 0.121 | 4.72E-89 | 1.06E-84 | 13 |
| NFKBIA | 0.5374344 | 0.713 | 0.505 | 2.81E-21 | 6.33E-17 | 13 |
| KCTD12 | 0.5376749 | 0.417 | 0.089 | 2.14E-145 | 4.84E-141 | 13 |
| ADA2 | 0.5429641 | 0.503 | 0.188 | 1.02E-70 | 2.31E-66 | 13 |
| CSF3R | 0.5467253 | 0.352 | 0.057 | 1.30E-183 | 2.94E-179 | 13 |
| DBNL | 0.5469666 | 0.62 | 0.275 | 3.46E-58 | 7.81E-54 | 13 |
| PSME2 | 0.5480398 | 0.79 | 0.624 | 6.79E-20 | 1.53E-15 | 13 |
| RGS18 | 0.5502519 | 0.308 | 0.03 | 3.68E-286 | 8.32E-282 | 13 |
| FGD2 | 0.5567568 | 0.405 | 0.078 | 1.82E-167 | 4.11E-163 | 13 |
| APPL1 | 0.5586346 | 0.538 | 0.193 | 3.01E-81 | 6.80E-77 | 13 |
| NUB1 | 0.5633462 | 0.396 | 0.206 | 7.12E-24 | 1.61E-19 | 13 |
| PABPC1 | 0.5633677 | 0.956 | 0.871 | 8.64E-58 | 1.95E-53 | 13 |
| TMSB4X | 0.5637636 | 0.996 | 0.98 | 1.06E-47 | 2.40E-43 | 13 |
| LAMTOR2 | 0.5654244 | 0.588 | 0.279 | 3.55E-50 | 8.01E-46 | 13 |
| LITAF | 0.5687541 | 0.737 | 0.477 | 2.92E-29 | 6.58E-25 | 13 |
| IER3 | 0.5694713 | 0.392 | 0.138 | 1.80E-61 | 4.06E-57 | 13 |
| UBE2E2 | 0.5705158 | 0.401 | 0.079 | 7.22E-163 | 1.63E-158 | 13 |
| ITGB2 | 0.5709359 | 0.764 | 0.559 | 2.18E-34 | 4.93E-30 | 13 |
| SYK | 0.5720024 | 0.466 | 0.124 | 3.95E-120 | 8.92E-116 | 13 |
| NAGA | 0.5732183 | 0.436 | 0.092 | 2.07E-160 | 4.67E-156 | 13 |
| TNFSF13 | 0.5786699 | 0.37 | 0.074 | 1.03E-145 | 2.33E-141 | 13 |
| DPYSL2 | 0.5844266 | 0.424 | 0.083 | 1.76E-171 | 3.97E-167 | 13 |
| DSE | 0.592395 | 0.44 | 0.096 | 1.77E-148 | 3.99E-144 | 13 |
| SLC8A1 | 0.5953262 | 0.382 | 0.056 | 5.91E-225 | 1.33E-220 | 13 |
| OTULINL | 0.5967252 | 0.475 | 0.129 | 5.74E-117 | 1.30E-112 | 13 |
| CTSS | 0.5973795 | 0.687 | 0.322 | 7.31E-67 | 1.65E-62 | 13 |
| RHOG | 0.5984457 | 0.772 | 0.444 | 1.82E-48 | 4.11E-44 | 13 |
| ICAM1 | 0.5988613 | 0.389 | 0.123 | 3.28E-73 | 7.40E-69 | 13 |
| IFNGR2 | 0.5997854 | 0.555 | 0.174 | 7.01E-106 | 1.58E-101 | 13 |
| TUBA1C | 0.6012534 | 0.419 | 0.192 | 2.21E-34 | 4.99E-30 | 13 |
| HMGA1 | 0.6022749 | 0.613 | 0.283 | 2.31E-57 | 5.22E-53 | 13 |
| NAAA | 0.6029557 | 0.497 | 0.184 | 1.48E-70 | 3.34E-66 | 13 |
| ACTG1 | 0.6052109 | 0.979 | 0.939 | 1.63E-36 | 3.68E-32 | 13 |
| ASAP1 | 0.6054674 | 0.424 | 0.08 | 2.19E-180 | 4.93E-176 | 13 |
| NAPSA | 0.6088871 | 0.326 | 0.037 | 1.85E-250 | 4.18E-246 | 13 |
| GPAT3 | 0.6141653 | 0.322 | 0.032 | 3.63E-293 | 8.19E-289 | 13 |
| ANXA5 | 0.614325 | 0.741 | 0.399 | 1.03E-53 | 2.32E-49 | 13 |
| TKT | 0.6175392 | 0.629 | 0.294 | 1.34E-57 | 3.02E-53 | 13 |
| ZFP36 | 0.6216549 | 0.758 | 0.73 | 9.15E-15 | 2.06E-10 | 13 |
| LTA4H | 0.6221378 | 0.508 | 0.175 | 1.10E-83 | 2.47E-79 | 13 |
| AHR | 0.6244602 | 0.464 | 0.126 | 6.97E-115 | 1.57E-110 | 13 |
| TIMP1 | 0.6249819 | 0.632 | 0.263 | 8.56E-79 | 1.93E-74 | 13 |
| ITGAX | 0.6286925 | 0.408 | 0.073 | 2.07E-188 | 4.67E-184 | 13 |
| PTRHD1 | 0.6300774 | 0.564 | 0.193 | 1.06E-94 | 2.40E-90 | 13 |
| GLIPR1 | 0.6318798 | 0.627 | 0.314 | 2.12E-56 | 4.78E-52 | 13 |
| NAIP | 0.6338892 | 0.424 | 0.09 | 1.11E-153 | 2.51E-149 | 13 |
| GABARAPL2 | 0.634958 | 0.736 | 0.465 | 7.72E-34 | 1.74E-29 | 13 |
| SERPINF2 | 0.6421734 | 0.25 | 0.015 | 0 | 0 | 13 |
| PNRC1 | 0.6446426 | 0.802 | 0.663 | 6.13E-22 | 1.38E-17 | 13 |
| IFNGR1 | 0.6475611 | 0.553 | 0.194 | 8.24E-90 | 1.86E-85 | 13 |
| P2RY13 | 0.6493504 | 0.312 | 0.029 | 3.55E-307 | 8.01E-303 | 13 |
| UVRAG | 0.654139 | 0.531 | 0.167 | 2.55E-103 | 5.75E-99 | 13 |
| CD1D | 0.6611745 | 0.34 | 0.028 | 0 | 0 | 13 |
| PLXDC2 | 0.6623433 | 0.42 | 0.087 | 2.42E-157 | 5.47E-153 | 13 |
| LGALS9 | 0.6643552 | 0.564 | 0.177 | 7.14E-108 | 1.61E-103 | 13 |
| NR4A3 | 0.665457 | 0.37 | 0.09 | 5.58E-109 | 1.26E-104 | 13 |
| BID | 0.6672486 | 0.473 | 0.149 | 4.22E-93 | 9.53E-89 | 13 |
| VAMP8 | 0.668905 | 0.82 | 0.531 | 1.25E-54 | 2.82E-50 | 13 |
| IFI30 | 0.6734081 | 0.424 | 0.084 | 3.89E-166 | 8.78E-162 | 13 |
| PSAP | 0.6748561 | 0.771 | 0.474 | 2.14E-69 | 4.83E-65 | 13 |
| S100A6 | 0.6797288 | 0.907 | 0.832 | 8.83E-35 | 1.99E-30 | 13 |
| DAPP1 | 0.6803046 | 0.426 | 0.097 | 6.31E-140 | 1.42E-135 | 13 |
| EIF3L | 0.6834312 | 0.772 | 0.496 | 9.33E-51 | 2.11E-46 | 13 |
| GNG5 | 0.6861665 | 0.842 | 0.614 | 5.04E-46 | 1.14E-41 | 13 |
| NDRG2 | 0.6899202 | 0.399 | 0.047 | 2.50E-300 | 5.64E-296 | 13 |
| GRINA | 0.6939913 | 0.648 | 0.294 | 1.59E-65 | 3.60E-61 | 13 |
| YBX1 | 0.6959626 | 0.909 | 0.752 | 1.61E-65 | 3.63E-61 | 13 |
| CAT | 0.6964861 | 0.524 | 0.153 | 6.87E-119 | 1.55E-114 | 13 |
| NAP1L1 | 0.6968893 | 0.751 | 0.433 | 7.92E-54 | 1.79E-49 | 13 |
| SHTN1 | 0.7019242 | 0.368 | 0.049 | 2.15E-247 | 4.86E-243 | 13 |
| IFITM3 | 0.7040287 | 0.72 | 0.565 | 1.61E-20 | 3.63E-16 | 13 |
| SLAMF8 | 0.7041153 | 0.385 | 0.064 | 1.23E-193 | 2.78E-189 | 13 |
| FLT3 | 0.7085246 | 0.303 | 0.004 | 0 | 0 | 13 |
| ARPC3 | 0.7123358 | 0.923 | 0.771 | 1.46E-69 | 3.30E-65 | 13 |
| ATG3 | 0.7142591 | 0.625 | 0.254 | 2.46E-83 | 5.56E-79 | 13 |
| TAGLN2 | 0.7171266 | 0.877 | 0.634 | 5.16E-52 | 1.16E-47 | 13 |
| MPEG1 | 0.7184489 | 0.373 | 0.076 | 2.26E-143 | 5.11E-139 | 13 |
| S100A11 | 0.7187495 | 0.933 | 0.725 | 3.91E-63 | 8.82E-59 | 13 |
| CD33 | 0.7268113 | 0.389 | 0.051 | 2.80E-267 | 6.32E-263 | 13 |
| LAMTOR1 | 0.7308565 | 0.75 | 0.382 | 2.70E-69 | 6.10E-65 | 13 |
| PHACTR1 | 0.7361039 | 0.392 | 0.068 | 6.31E-190 | 1.42E-185 | 13 |
| CTSZ | 0.7408441 | 0.609 | 0.166 | 4.31E-156 | 9.73E-152 | 13 |
| GCA | 0.7455959 | 0.531 | 0.122 | 4.14E-175 | 9.34E-171 | 13 |
| ALOX5 | 0.7490386 | 0.478 | 0.109 | 1.81E-157 | 4.09E-153 | 13 |
| SPINT2 | 0.7490971 | 0.653 | 0.254 | 2.28E-100 | 5.16E-96 | 13 |
| CHMP1B | 0.7499401 | 0.476 | 0.196 | 1.66E-58 | 3.75E-54 | 13 |
| HLA-DOA | 0.7619612 | 0.504 | 0.085 | 1.45E-249 | 3.28E-245 | 13 |
| ANXA2 | 0.7657701 | 0.776 | 0.439 | 3.27E-61 | 7.39E-57 | 13 |
| SLC25A6 | 0.7659057 | 0.893 | 0.719 | 8.45E-71 | 1.91E-66 | 13 |
| NCF2 | 0.7708297 | 0.438 | 0.086 | 1.14E-178 | 2.58E-174 | 13 |
| CD40 | 0.774562 | 0.349 | 0.098 | 9.66E-84 | 2.18E-79 | 13 |
| LGALS1 | 0.7786821 | 0.86 | 0.5 | 1.11E-63 | 2.51E-59 | 13 |
| SLC25A5 | 0.7791651 | 0.825 | 0.54 | 3.32E-66 | 7.50E-62 | 13 |
| RAC1 | 0.77917 | 0.72 | 0.403 | 7.95E-57 | 1.79E-52 | 13 |
| C20orf27 | 0.779198 | 0.538 | 0.144 | 8.74E-145 | 1.97E-140 | 13 |
| PLBD1 | 0.779825 | 0.443 | 0.058 | 6.74E-305 | 1.52E-300 | 13 |
| CLIC2 | 0.78226 | 0.394 | 0.019 | 0 | 0 | 13 |
| CSF1R | 0.7860755 | 0.434 | 0.091 | 9.96E-157 | 2.25E-152 | 13 |
| TUBA1A | 0.7916045 | 0.674 | 0.32 | 6.57E-69 | 1.48E-64 | 13 |
| NME2 | 0.7927436 | 0.729 | 0.395 | 2.78E-66 | 6.27E-62 | 13 |
| PGLS | 0.8012528 | 0.736 | 0.35 | 9.61E-83 | 2.17E-78 | 13 |
| CEBPD | 0.8019817 | 0.38 | 0.087 | 4.23E-126 | 9.54E-122 | 13 |
| AP2S1 | 0.8026296 | 0.751 | 0.369 | 1.59E-78 | 3.59E-74 | 13 |
| BIRC3 | 0.8029901 | 0.396 | 0.267 | 3.71E-08 | 0.0008382 | 13 |
| PRCP | 0.8168207 | 0.539 | 0.127 | 7.56E-177 | 1.71E-172 | 13 |
| TMEM14C | 0.8189911 | 0.665 | 0.285 | 4.39E-88 | 9.91E-84 | 13 |
| PLAUR | 0.8204655 | 0.441 | 0.117 | 1.68E-114 | 3.79E-110 | 13 |
| NET1 | 0.8255962 | 0.291 | 0.042 | 1.60E-176 | 3.62E-172 | 13 |
| GPX4 | 0.8375976 | 0.86 | 0.613 | 1.30E-51 | 2.93E-47 | 13 |
| ATF3 | 0.847074 | 0.37 | 0.086 | 5.31E-120 | 1.20E-115 | 13 |
| GDI2 | 0.8530644 | 0.757 | 0.397 | 7.71E-79 | 1.74E-74 | 13 |
| RNH1 | 0.8761799 | 0.718 | 0.341 | 2.79E-85 | 6.29E-81 | 13 |
| RNF130 | 0.879603 | 0.583 | 0.17 | 1.94E-135 | 4.39E-131 | 13 |
| SMCO4 | 0.8815478 | 0.525 | 0.115 | 9.26E-193 | 2.09E-188 | 13 |
| PTPRE | 0.8832344 | 0.534 | 0.171 | 9.28E-112 | 2.09E-107 | 13 |
| LY86 | 0.885744 | 0.546 | 0.098 | 2.55E-256 | 5.75E-252 | 13 |
| CLEC4A | 0.8890729 | 0.44 | 0.051 | 0 | 0 | 13 |
| CD86 | 0.8900588 | 0.524 | 0.089 | 3.74E-262 | 8.45E-258 | 13 |
| WARS | 0.8914557 | 0.517 | 0.154 | 2.81E-118 | 6.34E-114 | 13 |
| SERPINB1 | 0.8914826 | 0.709 | 0.352 | 2.47E-70 | 5.58E-66 | 13 |
| FTH1 | 0.8971451 | 0.998 | 0.974 | 5.32E-152 | 1.20E-147 | 13 |
| H2AFY | 0.8979764 | 0.709 | 0.299 | 1.06E-104 | 2.40E-100 | 13 |
| RAB32 | 0.8987118 | 0.455 | 0.073 | 6.60E-246 | 1.49E-241 | 13 |
| 1-Mar | 0.9016855 | 0.562 | 0.112 | 2.83E-230 | 6.39E-226 | 13 |
| FOS | 0.9027673 | 0.769 | 0.642 | 9.34E-41 | 2.11E-36 | 13 |
| MAN2B1 | 0.9066009 | 0.655 | 0.21 | 6.52E-144 | 1.47E-139 | 13 |
| TNFSF13B | 0.9069763 | 0.613 | 0.148 | 2.63E-186 | 5.94E-182 | 13 |
| RGS10 | 0.912929 | 0.814 | 0.49 | 2.72E-73 | 6.14E-69 | 13 |
| BCL2A1 | 0.9136804 | 0.469 | 0.173 | 1.19E-72 | 2.69E-68 | 13 |
| IL13RA1 | 0.9137542 | 0.469 | 0.071 | 4.60E-279 | 1.04E-274 | 13 |
| FGR | 0.9143466 | 0.524 | 0.087 | 2.22E-267 | 5.00E-263 | 13 |
| ATF5 | 0.9179322 | 0.427 | 0.129 | 2.02E-93 | 4.55E-89 | 13 |
| PLD4 | 0.9212243 | 0.45 | 0.05 | 0 | 0 | 13 |
| TNFAIP2 | 0.9264025 | 0.359 | 0.074 | 5.18E-136 | 1.17E-131 | 13 |
| C1orf54 | 0.9342107 | 0.329 | 0.055 | 7.89E-167 | 1.78E-162 | 13 |
| CIITA | 0.9377324 | 0.522 | 0.084 | 2.40E-280 | 5.41E-276 | 13 |
| PKIB | 0.9398427 | 0.391 | 0.052 | 3.22E-263 | 7.26E-259 | 13 |
| TMEM176A | 0.9400636 | 0.289 | 0.088 | 2.94E-60 | 6.63E-56 | 13 |
| TMEM176B | 0.9501523 | 0.324 | 0.096 | 2.01E-72 | 4.54E-68 | 13 |
| PYCARD | 0.9602484 | 0.694 | 0.346 | 1.32E-82 | 2.98E-78 | 13 |
| AP1S2 | 0.9650819 | 0.643 | 0.219 | 1.75E-130 | 3.95E-126 | 13 |
| RGS2 | 0.9703823 | 0.506 | 0.172 | 5.72E-95 | 1.29E-90 | 13 |
| VIM | 0.976415 | 0.988 | 0.881 | 7.21E-99 | 1.63E-94 | 13 |
| TYMP | 0.9797257 | 0.797 | 0.403 | 6.54E-92 | 1.48E-87 | 13 |
| GABARAP | 0.9806791 | 0.914 | 0.707 | 1.24E-114 | 2.79E-110 | 13 |
| LAP3 | 0.9818984 | 0.667 | 0.273 | 4.68E-99 | 1.06E-94 | 13 |
| YWHAH | 0.9834949 | 0.585 | 0.253 | 2.94E-67 | 6.64E-63 | 13 |
| CCDC88A | 0.9837468 | 0.595 | 0.12 | 1.07E-251 | 2.41E-247 | 13 |
| SGK1 | 0.9886985 | 0.44 | 0.146 | 5.40E-84 | 1.22E-79 | 13 |
| CXCL16 | 0.9940073 | 0.522 | 0.101 | 4.44E-221 | 1.00E-216 | 13 |
| CLEC7A | 0.9963162 | 0.55 | 0.097 | 1.65E-263 | 3.73E-259 | 13 |
| IL18 | 0.999082 | 0.496 | 0.079 | 7.44E-273 | 1.68E-268 | 13 |
| FCGRT | 1.0123456 | 0.651 | 0.176 | 4.07E-180 | 9.18E-176 | 13 |
| RAB31 | 1.0301163 | 0.637 | 0.132 | 3.12E-248 | 7.05E-244 | 13 |
| PPT1 | 1.0356996 | 0.665 | 0.232 | 1.70E-134 | 3.84E-130 | 13 |
| CSTA | 1.0401779 | 0.469 | 0.066 | 1.32E-301 | 2.97E-297 | 13 |
| PLEK | 1.0534155 | 0.658 | 0.198 | 5.20E-157 | 1.17E-152 | 13 |
| SNX3 | 1.0619287 | 0.767 | 0.474 | 5.64E-48 | 1.27E-43 | 13 |
| SYNGR2 | 1.077702 | 0.806 | 0.453 | 4.98E-90 | 1.12E-85 | 13 |
| COTL1 | 1.0801336 | 0.827 | 0.555 | 1.97E-65 | 4.45E-61 | 13 |
| ZNF385A | 1.08534 | 0.594 | 0.086 | 0 | 0 | 13 |
| SERPINF1 | 1.0984368 | 0.506 | 0.077 | 6.74E-290 | 1.52E-285 | 13 |
| TMSB10 | 1.0988995 | 0.998 | 0.982 | 9.80E-174 | 2.21E-169 | 13 |
| CALHM6 | 1.0990031 | 0.588 | 0.117 | 4.68E-248 | 1.06E-243 | 13 |
| ACTB | 1.1101567 | 0.996 | 0.988 | 7.02E-117 | 1.59E-112 | 13 |
| BASP1 | 1.1226126 | 0.51 | 0.068 | 0 | 0 | 13 |
| CSF2RA | 1.1243063 | 0.496 | 0.044 | 0 | 0 | 13 |
| RNASE6 | 1.1462946 | 0.511 | 0.113 | 1.78E-192 | 4.01E-188 | 13 |
| HCK | 1.1556445 | 0.609 | 0.081 | 0 | 0 | 13 |
| LSP1 | 1.1567427 | 0.928 | 0.684 | 4.37E-96 | 9.87E-92 | 13 |
| SERPINA1 | 1.157857 | 0.545 | 0.115 | 3.98E-204 | 8.98E-200 | 13 |
| JAML | 1.1594332 | 0.583 | 0.149 | 6.34E-182 | 1.43E-177 | 13 |
| S100A10 | 1.1692862 | 0.925 | 0.697 | 1.47E-89 | 3.32E-85 | 13 |
| TUBA1B | 1.1887277 | 0.853 | 0.506 | 1.59E-110 | 3.59E-106 | 13 |
| IRF8 | 1.2161545 | 0.42 | 0.11 | 2.45E-117 | 5.53E-113 | 13 |
| SAMHD1 | 1.2209604 | 0.72 | 0.314 | 4.28E-125 | 9.67E-121 | 13 |
| NPC2 | 1.22724 | 0.825 | 0.348 | 1.06E-141 | 2.40E-137 | 13 |
| FCER1G | 1.2305406 | 0.734 | 0.192 | 5.06E-198 | 1.14E-193 | 13 |
| HLA-DMB | 1.235527 | 0.653 | 0.174 | 3.37E-202 | 7.60E-198 | 13 |
| GRN | 1.2422608 | 0.785 | 0.246 | 1.24E-208 | 2.79E-204 | 13 |
| FCGR2B | 1.2732915 | 0.443 | 0.099 | 6.61E-166 | 1.49E-161 | 13 |
| RASSF4 | 1.2742166 | 0.548 | 0.086 | 7.44E-308 | 1.68E-303 | 13 |
| IGSF6 | 1.2966548 | 0.559 | 0.084 | 0 | 0 | 13 |
| C1orf162 | 1.2971502 | 0.715 | 0.226 | 1.72E-182 | 3.88E-178 | 13 |
| PAK1 | 1.2994048 | 0.66 | 0.11 | 0 | 0 | 13 |
| CDKN1A | 1.3313352 | 0.476 | 0.184 | 1.28E-76 | 2.89E-72 | 13 |
| TXN | 1.3439441 | 0.725 | 0.477 | 8.41E-26 | 1.90E-21 | 13 |
| FCN1 | 1.3447007 | 0.312 | 0.033 | 1.32E-266 | 2.99E-262 | 13 |
| IL1B | 1.366767 | 0.424 | 0.066 | 1.24E-230 | 2.81E-226 | 13 |
| PEA15 | 1.3837813 | 0.68 | 0.168 | 1.79E-240 | 4.03E-236 | 13 |
| HLA-DQB2 | 1.3997269 | 0.506 | 0.067 | 0 | 0 | 13 |
| TYROBP | 1.4066929 | 0.855 | 0.225 | 9.98E-243 | 2.25E-238 | 13 |
| CD83 | 1.459331 | 0.62 | 0.172 | 8.74E-176 | 1.97E-171 | 13 |
| CFP | 1.5448502 | 0.475 | 0.03 | 0 | 0 | 13 |
| PPA1 | 1.57444 | 0.746 | 0.314 | 5.58E-144 | 1.26E-139 | 13 |
| MNDA | 1.5842111 | 0.671 | 0.097 | 0 | 0 | 13 |
| KLF4 | 1.5963094 | 0.557 | 0.064 | 0 | 0 | 13 |
| C15orf48 | 1.6177563 | 0.37 | 0.083 | 3.24E-126 | 7.31E-122 | 13 |
| LST1 | 1.6657639 | 0.723 | 0.136 | 0 | 0 | 13 |
| AIF1 | 1.6921429 | 0.79 | 0.165 | 0 | 0 | 13 |
| FGL2 | 1.7124224 | 0.674 | 0.109 | 0 | 0 | 13 |
| HLA-DMA | 1.7503333 | 0.82 | 0.324 | 6.58E-214 | 1.48E-209 | 13 |
| CTSH | 1.7592137 | 0.779 | 0.215 | 6.33E-277 | 1.43E-272 | 13 |
| ALDH2 | 1.8000146 | 0.702 | 0.09 | 0 | 0 | 13 |
| MS4A6A | 1.8340257 | 0.625 | 0.122 | 3.82E-283 | 8.61E-279 | 13 |
| GSTP1 | 1.8441984 | 0.923 | 0.529 | 7.09E-206 | 1.60E-201 | 13 |
| SPI1 | 2.0034355 | 0.841 | 0.156 | 0 | 0 | 13 |
| CD1E | 2.0296271 | 0.422 | 0.01 | 0 | 0 | 13 |
| HLA-DQA2 | 2.1232446 | 0.755 | 0.196 | 2.38E-281 | 5.36E-277 | 13 |
| GSN | 2.1482543 | 0.811 | 0.152 | 0 | 0 | 13 |
| CPVL | 2.2113532 | 0.627 | 0.06 | 0 | 0 | 13 |
| CD1C | 2.2199648 | 0.466 | 0.019 | 0 | 0 | 13 |
| MARCKSL1 | 2.2447059 | 0.567 | 0.217 | 1.12E-96 | 2.52E-92 | 13 |
| FSCN1 | 2.2873821 | 0.366 | 0.041 | 1.99E-306 | 4.49E-302 | 13 |
| CD74 | 2.4979523 | 1 | 0.9 | 5.01E-275 | 1.13E-270 | 13 |
| LGALS2 | 2.5152284 | 0.694 | 0.027 | 0 | 0 | 13 |
| FCER1A | 2.537887 | 0.455 | 0.019 | 0 | 0 | 13 |
| CLEC10A | 2.6392336 | 0.555 | 0.019 | 0 | 0 | 13 |
| HLA-DRB5 | 2.694742 | 0.909 | 0.428 | 2.24E-259 | 5.05E-255 | 13 |
| HLA-DRB1 | 2.7658204 | 0.949 | 0.528 | 3.66E-261 | 8.26E-257 | 13 |
| HLA-DQB1 | 2.8177118 | 0.918 | 0.315 | 0 | 0 | 13 |
| HLA-DQA1 | 2.9503468 | 0.942 | 0.305 | 0 | 0 | 13 |
| HLA-DPA1 | 2.9695989 | 0.984 | 0.55 | 0 | 0 | 13 |
| HLA-DRA | 3.036447 | 0.984 | 0.421 | 0 | 0 | 13 |
| LYZ | 3.1290116 | 0.835 | 0.141 | 0 | 0 | 13 |
| HLA-DPB1 | 3.2099997 | 0.984 | 0.531 | 0 | 0 | 13 |
| CST3 | 3.7272034 | 0.949 | 0.233 | 0 | 0 | 13 |

| **Table S3.The genes associated with prognosis based on TCGA database** | | | | | | |
| --- | --- | --- | --- | --- | --- | --- |
| gene | p value |  |  |  |  |  |
| CD68 | 0.059303 |  |  |  |  |  |
| SHISA5 | 0.003161 |  |  |  |  |  |
| HLA-DRB1 | 0.025707 |  |  |  |  |  |
| ISG20 | 0.007995 |  |  |  |  |  |
| TUBA1B | 0.044707 |  |  |  |  |  |
| BID | 0.542548 |  |  |  |  |  |
| HLA-DRB5 | 0.113612 |  |  |  |  |  |
| LEPROTL1 | 0.057021 |  |  |  |  |  |
| SLC9A3R1 | 0.137968 |  |  |  |  |  |
| GCA | 0.228627 |  |  |  |  |  |
| HLA-DQB1 | 0.072309 |  |  |  |  |  |
| HLA-DQA1 | 0.00737 |  |  |  |  |  |
| C20orf27 | 0.707677 |  |  |  |  |  |
| PTPN7 | 0.01822 |  |  |  |  |  |
| TIMP1 | 0.223688 |  |  |  |  |  |
| PLXDC2 | 0.312536 |  |  |  |  |  |
| HLA-DQA2 | 0.019112 |  |  |  |  |  |
| CXCL16 | 0.042553 |  |  |  |  |  |
| ITGB2 | 0.491632 |  |  |  |  |  |
| CSF2RA | 0.606198 |  |  |  |  |  |
| CD1D | 0.176809 |  |  |  |  |  |
| PEA15 | 0.249095 |  |  |  |  |  |
| DPYSL2 | 0.050714 |  |  |  |  |  |
| HLA-DQB2 | 0.000764 |  |  |  |  |  |
| CCND3 | 0.239265 |  |  |  |  |  |
| S100A6 | 0.877519 |  |  |  |  |  |
| ARF5 | 0.176336 |  |  |  |  |  |
| FGD2 | 0.037144 |  |  |  |  |  |
| KDM2B | 0.152321 |  |  |  |  |  |
| FCGRT | 0.811687 |  |  |  |  |  |
| KRT10 | 0.719374 |  |  |  |  |  |
| ANXA2 | 0.594618 |  |  |  |  |  |
| RNH1 | 0.245605 |  |  |  |  |  |
| SLC25A5 | 0.054579 |  |  |  |  |  |
| CD1E | 0.019878 |  |  |  |  |  |
| IL1B | 0.76602 |  |  |  |  |  |
| ZAP70 | 0.005725 |  |  |  |  |  |
| MS4A6A | 0.892101 |  |  |  |  |  |
| GLIPR1 | 0.021545 |  |  |  |  |  |
| CLEC7A | 0.835807 |  |  |  |  |  |
| PIM2 | 0.055483 |  |  |  |  |  |
| TSC22D3 | 0.310628 |  |  |  |  |  |
| CD3G | 0.004872 |  |  |  |  |  |
| GRN | 0.975347 |  |  |  |  |  |
| TRAC | 0.000904 |  |  |  |  |  |
| SH2D2A | 0.015595 |  |  |  |  |  |
| BTG1 | 0.000466 |  |  |  |  |  |
| ETV6 | 0.168947 |  |  |  |  |  |
| CCL5 | 0.021824 |  |  |  |  |  |
| NAPSA | 0.164257 |  |  |  |  |  |
| ARHGAP9 | 0.010558 |  |  |  |  |  |
| TAGLN2 | 0.276759 |  |  |  |  |  |
| RGS2 | 0.034731 |  |  |  |  |  |
| TYROBP | 0.103279 |  |  |  |  |  |
| PARP8 | 0.484353 |  |  |  |  |  |
| MT2A | 0.1561 |  |  |  |  |  |
| PSME2 | 0.00026 |  |  |  |  |  |
| DDX24 | 0.348036 |  |  |  |  |  |
| ARPC3 | 0.509512 |  |  |  |  |  |
| UBE2E2 | 0.31365 |  |  |  |  |  |
| KMT2E | 0.578139 |  |  |  |  |  |
| TRBC1 | 0.000137 |  |  |  |  |  |
| MYD88 | 0.11689 |  |  |  |  |  |
| ALOX5AP | 0.446745 |  |  |  |  |  |
| SERPINA1 | 0.000826 |  |  |  |  |  |
| BIN2 | 0.042188 |  |  |  |  |  |
| TUBA1C | 0.004069 |  |  |  |  |  |
| IL7R | 0.009142 |  |  |  |  |  |
| WARS | 0.212078 |  |  |  |  |  |
| PRKCH | 0.982269 |  |  |  |  |  |
| AIF1 | 0.043651 |  |  |  |  |  |
| CMTM6 | 0.075021 |  |  |  |  |  |
| RGS18 | 0.085217 |  |  |  |  |  |
| B2M | 0.174942 |  |  |  |  |  |
| IKZF3 | 0.088118 |  |  |  |  |  |
| SPI1 | 0.364758 |  |  |  |  |  |
| RAC2 | 5.32E-05 |  |  |  |  |  |
| LAMP1 | 0.871617 |  |  |  |  |  |
| NR4A3 | 0.030644 |  |  |  |  |  |
| PAXX | 0.833563 |  |  |  |  |  |
| CHMP1B | 0.299081 |  |  |  |  |  |
| OPTN | 0.179327 |  |  |  |  |  |
| CAPG | 0.673244 |  |  |  |  |  |
| CTSW | 0.000882 |  |  |  |  |  |
| NDRG2 | 0.151712 |  |  |  |  |  |
| LITAF | 0.948519 |  |  |  |  |  |
| GPAT3 | 0.824348 |  |  |  |  |  |
| LAP3 | 0.060179 |  |  |  |  |  |
| SPCS2 | 0.529 |  |  |  |  |  |
| GYPC | 0.066009 |  |  |  |  |  |
| LYN | 0.222512 |  |  |  |  |  |
| IFI6 | 0.712122 |  |  |  |  |  |
| SGK1 | 0.049324 |  |  |  |  |  |
| FCER1G | 0.23958 |  |  |  |  |  |
| PIM1 | 0.077796 |  |  |  |  |  |
| CD2 | 0.001091 |  |  |  |  |  |
| CD6 | 0.000944 |  |  |  |  |  |
| CD40 | 0.121226 |  |  |  |  |  |
| IFITM1 | 0.011169 |  |  |  |  |  |
| IL2RG | 0.007698 |  |  |  |  |  |
| ANAPC16 | 0.955324 |  |  |  |  |  |
| P2RY13 | 0.079119 |  |  |  |  |  |
| LST1 | 0.011073 |  |  |  |  |  |
| NME2 | 0.321347 |  |  |  |  |  |
| LGALS1 | 0.164384 |  |  |  |  |  |
| CXCR4 | 0.095077 |  |  |  |  |  |
| HLA-DPA1 | 0.028737 |  |  |  |  |  |
| COTL1 | 0.162618 |  |  |  |  |  |
| RBL2 | 0.615725 |  |  |  |  |  |
| ATF3 | 0.044726 |  |  |  |  |  |
| DSE | 0.764904 |  |  |  |  |  |
| SPINT2 | 0.492624 |  |  |  |  |  |
| C1orf54 | 0.212244 |  |  |  |  |  |
| TBC1D10C | 0.001954 |  |  |  |  |  |
| ISG15 | 0.340629 |  |  |  |  |  |
| CD1C | 0.015123 |  |  |  |  |  |
| PLD4 | 0.048461 |  |  |  |  |  |
| ZNF385A | 0.173125 |  |  |  |  |  |
| TYMP | 0.087752 |  |  |  |  |  |
| DBNL | 0.409219 |  |  |  |  |  |
| APOBEC3G | 0.000506 |  |  |  |  |  |
| IL18 | 0.037314 |  |  |  |  |  |
| CD86 | 0.248068 |  |  |  |  |  |
| CSTA | 0.015172 |  |  |  |  |  |
| FAM49A | 0.40023 |  |  |  |  |  |
| CD74 | 0.002873 |  |  |  |  |  |
| MALAT1 | 0.913828 |  |  |  |  |  |
| TMSB4X | 0.647916 |  |  |  |  |  |
| GABARAPL2 | 0.072841 |  |  |  |  |  |
| CSF1R | 0.261852 |  |  |  |  |  |
| CST3 | 0.084429 |  |  |  |  |  |
| AHR | 0.060635 |  |  |  |  |  |
| EVL | 0.046004 |  |  |  |  |  |
| MYCL | 0.123704 |  |  |  |  |  |
| RARRES3 | 0.0096 |  |  |  |  |  |
| TRBC2 | 0.000483 |  |  |  |  |  |
| SMCHD1 | 0.641215 |  |  |  |  |  |
| ATG3 | 0.454321 |  |  |  |  |  |
| LTA4H | 0.087651 |  |  |  |  |  |
| CD69 | 0.011064 |  |  |  |  |  |
| APPL1 | 0.704469 |  |  |  |  |  |
| CLEC4A | 0.294173 |  |  |  |  |  |
| PKIB | 0.528513 |  |  |  |  |  |
| JUN | 0.043895 |  |  |  |  |  |
| ZYX | 0.074091 |  |  |  |  |  |
| GSN | 0.032862 |  |  |  |  |  |
| KIAA1551 | 0.121758 |  |  |  |  |  |
| AES | 0.627808 |  |  |  |  |  |
| SERPINB1 | 0.242878 |  |  |  |  |  |
| GZMA | 0.001348 |  |  |  |  |  |
| TMSB10 | 0.600724 |  |  |  |  |  |
| ACTB | 0.419138 |  |  |  |  |  |
| CTSH | 0.188906 |  |  |  |  |  |
| TKT | 0.465438 |  |  |  |  |  |
| TC2N | 0.735484 |  |  |  |  |  |
| MAN2B1 | 0.25259 |  |  |  |  |  |
| BTN3A2 | 0.067841 |  |  |  |  |  |
| PDCD4 | 0.438317 |  |  |  |  |  |
| GIMAP7 | 0.007173 |  |  |  |  |  |
| HLA-DOA | 0.19314 |  |  |  |  |  |
| RPS29 | 0.002903 |  |  |  |  |  |
| RAB32 | 0.931813 |  |  |  |  |  |
| TPST2 | 0.398622 |  |  |  |  |  |
| YWHAH | 0.496512 |  |  |  |  |  |
| CALM1 | 0.117946 |  |  |  |  |  |
| RGS10 | 0.110756 |  |  |  |  |  |
| PPA1 | 0.307519 |  |  |  |  |  |
| TUBA4A | 0.161526 |  |  |  |  |  |
| PTAFR | 0.021382 |  |  |  |  |  |
| SKAP1 | 0.001645 |  |  |  |  |  |
| PAK1 | 0.322584 |  |  |  |  |  |
| CD8A | 0.030019 |  |  |  |  |  |
| CD83 | 0.022389 |  |  |  |  |  |
| P2RY6 | 0.391825 |  |  |  |  |  |
| GBP5 | 0.19171 |  |  |  |  |  |
| IL13RA1 | 0.025232 |  |  |  |  |  |
| NAGK | 0.829896 |  |  |  |  |  |
| ALDH2 | 0.119922 |  |  |  |  |  |
| C19orf66 | 0.002985 |  |  |  |  |  |
| MARCKSL1 | 0.260684 |  |  |  |  |  |
| GPX4 | 0.337595 |  |  |  |  |  |
| UVRAG | 0.367449 |  |  |  |  |  |
| LAMTOR1 | 0.223489 |  |  |  |  |  |
| GDI2 | 0.37828 |  |  |  |  |  |
| FTH1 | 0.562582 |  |  |  |  |  |
| C15orf48 | 0.079029 |  |  |  |  |  |
| CTSD | 0.2655 |  |  |  |  |  |
| NAGA | 0.053024 |  |  |  |  |  |
| SLC25A3 | 0.319697 |  |  |  |  |  |
| SCIMP | 0.075763 |  |  |  |  |  |
| MNDA | 0.200355 |  |  |  |  |  |
| SEC62 | 0.452781 |  |  |  |  |  |
| CAT | 0.137507 |  |  |  |  |  |
| IL2RB | 0.007088 |  |  |  |  |  |
| TSTD1 | 0.42885 |  |  |  |  |  |
| MEF2C | 0.256478 |  |  |  |  |  |
| CD99 | 0.354324 |  |  |  |  |  |
| NKG7 | 0.015193 |  |  |  |  |  |
| AP1S2 | 0.939385 |  |  |  |  |  |
| SLC8A1 | 0.65624 |  |  |  |  |  |
| CLIC2 | 0.142642 |  |  |  |  |  |
| PHF1 | 0.224725 |  |  |  |  |  |
| LGALS2 | 0.003918 |  |  |  |  |  |
| MT1X | 0.376611 |  |  |  |  |  |
| RASSF2 | 0.175194 |  |  |  |  |  |
| FLT3 | 0.011256 |  |  |  |  |  |
| LAT | 0.057695 |  |  |  |  |  |
| EIF3L | 0.514526 |  |  |  |  |  |
| SLC25A6 | 0.855464 |  |  |  |  |  |
| DDIT4 | 0.052931 |  |  |  |  |  |
| ACAP1 | 0.043949 |  |  |  |  |  |
| SAT1 | 0.310394 |  |  |  |  |  |
| RHOG | 0.040561 |  |  |  |  |  |
| CUTA | 0.875764 |  |  |  |  |  |
| ARHGAP15 | 0.029127 |  |  |  |  |  |
| ETS1 | 0.020537 |  |  |  |  |  |
| ICAM1 | 0.015088 |  |  |  |  |  |
| NUB1 | 0.252726 |  |  |  |  |  |
| FSCN1 | 0.95505 |  |  |  |  |  |
| NFKBIA | 0.000786 |  |  |  |  |  |
| GZMK | 0.015534 |  |  |  |  |  |
| FGR | 0.051677 |  |  |  |  |  |
| CD96 | 0.001985 |  |  |  |  |  |
| VIM | 0.19529 |  |  |  |  |  |
| PABPC1 | 0.157614 |  |  |  |  |  |
| MGST2 | 0.984154 |  |  |  |  |  |
| CCL4 | 0.964431 |  |  |  |  |  |
| CD33 | 0.061631 |  |  |  |  |  |
| SERPINF2 | 0.024172 |  |  |  |  |  |
| RAC1 | 0.417833 |  |  |  |  |  |
| LBH | 0.015545 |  |  |  |  |  |
| RPS24 | 0.032879 |  |  |  |  |  |
| ZFP36L2 | 0.125204 |  |  |  |  |  |
| HLA-DRA | 0.00157 |  |  |  |  |  |
| TECR | 0.829404 |  |  |  |  |  |
| SLAMF8 | 0.818347 |  |  |  |  |  |
| CTSS | 0.068638 |  |  |  |  |  |
| CCDC88A | 0.930572 |  |  |  |  |  |
| SUN2 | 0.136621 |  |  |  |  |  |
| GADD45B | 0.909535 |  |  |  |  |  |
| PTRHD1 | 0.068652 |  |  |  |  |  |
| LCP2 | 0.103483 |  |  |  |  |  |
| NPC2 | 0.020038 |  |  |  |  |  |
| AAK1 | 0.051199 |  |  |  |  |  |
| ALOX5 | 0.046744 |  |  |  |  |  |
| SELENOM | 0.59704 |  |  |  |  |  |
| ACTG1 | 0.234331 |  |  |  |  |  |
| PPP2R5C | 0.809555 |  |  |  |  |  |
| LSP1 | 0.069964 |  |  |  |  |  |
| LGALS9 | 0.042765 |  |  |  |  |  |
| KCTD12 | 0.268068 |  |  |  |  |  |
| CD27 | 0.010005 |  |  |  |  |  |
| HLA-A | 0.034315 |  |  |  |  |  |
| ATP2B1-AS1 | 0.825673 |  |  |  |  |  |
| TNFSF13 | 0.790033 |  |  |  |  |  |
| C1orf162 | 0.093242 |  |  |  |  |  |
| OCIAD2 | 0.534071 |  |  |  |  |  |
| VAMP8 | 0.878276 |  |  |  |  |  |
| RNF130 | 0.458846 |  |  |  |  |  |
| NCF2 | 0.308243 |  |  |  |  |  |
| S100A10 | 0.639256 |  |  |  |  |  |
| LY86 | 0.249071 |  |  |  |  |  |
| CORO1A | 0.007705 |  |  |  |  |  |
| TMEM176B | 0.476007 |  |  |  |  |  |
| S100A11 | 0.512108 |  |  |  |  |  |
| YBX1 | 0.877257 |  |  |  |  |  |
| PGLS | 0.230973 |  |  |  |  |  |
| DAPP1 | 0.427135 |  |  |  |  |  |
| NAIP | 0.201867 |  |  |  |  |  |
| HLA-DMA | 0.010256 |  |  |  |  |  |
| TNFAIP8L2 | 0.009272 |  |  |  |  |  |
| CD3E | 0.000482 |  |  |  |  |  |
| HLA-B | 0.102155 |  |  |  |  |  |
| CSF3R | 0.038111 |  |  |  |  |  |
| CD52 | 2.02E-05 |  |  |  |  |  |
| PHACTR1 | 0.298126 |  |  |  |  |  |
| C12orf57 | 0.337887 |  |  |  |  |  |
| ICAM3 | 0.036277 |  |  |  |  |  |
| SYNE2 | 0.710367 |  |  |  |  |  |
| SYNGR2 | 0.07865 |  |  |  |  |  |
| SHTN1 | 0.315087 |  |  |  |  |  |
| TNFAIP2 | 0.080318 |  |  |  |  |  |
| EZR | 0.09518 |  |  |  |  |  |
| LCK | 0.035801 |  |  |  |  |  |
| TMC8 | 0.011227 |  |  |  |  |  |
| NET1 | 0.054601 |  |  |  |  |  |
| CST7 | 0.002686 |  |  |  |  |  |
| H2AFY | 0.750149 |  |  |  |  |  |
| LYZ | 0.568341 |  |  |  |  |  |
| IFI30 | 0.275809 |  |  |  |  |  |
| PILRA | 0.375981 |  |  |  |  |  |
| BASP1 | 0.083662 |  |  |  |  |  |
| ADA2 | 0.075764 |  |  |  |  |  |
| ARHGEF1 | 0.159914 |  |  |  |  |  |
| MFSD1 | 0.141113 |  |  |  |  |  |
| HLA-C | 0.442709 |  |  |  |  |  |
| ZFP36 | 0.139482 |  |  |  |  |  |
| DNAJB1 | 0.082683 |  |  |  |  |  |
| RAB31 | 0.711972 |  |  |  |  |  |
| CD82 | 0.169522 |  |  |  |  |  |
| PRCP | 0.970462 |  |  |  |  |  |
| GRINA | 0.065822 |  |  |  |  |  |
| RPS27 | 0.009503 |  |  |  |  |  |
| GZMM | 0.006944 |  |  |  |  |  |
| SIT1 | 0.014713 |  |  |  |  |  |
| CDKN1A | 0.387292 |  |  |  |  |  |
| ATF5 | 0.085251 |  |  |  |  |  |
| FCER1A | 0.041625 |  |  |  |  |  |
| FUS | 0.785647 |  |  |  |  |  |
| ANXA5 | 0.343349 |  |  |  |  |  |
| BUB3 | 0.953228 |  |  |  |  |  |
| TNFSF13B | 0.93317 |  |  |  |  |  |
| PPT1 | 0.105468 |  |  |  |  |  |
| TMEM176A | 0.116995 |  |  |  |  |  |
| HCK | 0.325729 |  |  |  |  |  |
| FCMR | 0.061629 |  |  |  |  |  |
| LAMTOR2 | 0.336798 |  |  |  |  |  |
| ANKRD12 | 0.639257 |  |  |  |  |  |
| FLT3LG | 0.00055 |  |  |  |  |  |
| OTULINL | 0.185365 |  |  |  |  |  |
| FYB1 | 0.164049 |  |  |  |  |  |
| ZC3HAV1 | 0.588024 |  |  |  |  |  |
| HCST | 0.018033 |  |  |  |  |  |
| FOS | 0.121132 |  |  |  |  |  |
| IFNGR2 | 0.096657 |  |  |  |  |  |
| SOD1 | 0.890188 |  |  |  |  |  |
| PYCARD | 0.002369 |  |  |  |  |  |
| EIF4A2 | 0.363631 |  |  |  |  |  |
| HLA-DMB | 0.282775 |  |  |  |  |  |
| CD3D | 0.000448 |  |  |  |  |  |
| TMEM14C | 0.410705 |  |  |  |  |  |
| RAB7A | 0.174991 |  |  |  |  |  |
| IFI44L | 0.475524 |  |  |  |  |  |
| RHOH | 0.495618 |  |  |  |  |  |
| DENND2D | 0.15102 |  |  |  |  |  |
| IFNGR1 | 0.825921 |  |  |  |  |  |
| LMNA | 0.066285 |  |  |  |  |  |
| CXCR3 | 0.025668 |  |  |  |  |  |
| GABARAP | 0.765386 |  |  |  |  |  |
| SNX3 | 0.041577 |  |  |  |  |  |
| CHST12 | 0.211198 |  |  |  |  |  |
| MPEG1 | 0.23321 |  |  |  |  |  |
| PTPRE | 0.404431 |  |  |  |  |  |
| TRAF3IP3 | 0.005419 |  |  |  |  |  |
| SLC38A1 | 0.041395 |  |  |  |  |  |
| RNF213 | 0.881695 |  |  |  |  |  |
| PLEKHO1 | 0.061173 |  |  |  |  |  |
| CLEC2D | 0.001611 |  |  |  |  |  |
| RASAL3 | 0.024103 |  |  |  |  |  |
| IRF8 | 0.145149 |  |  |  |  |  |
| SYK | 0.550318 |  |  |  |  |  |
| STK17A | 0.017911 |  |  |  |  |  |
| IER3 | 0.013103 |  |  |  |  |  |
| EML4 | 0.373957 |  |  |  |  |  |
| FCGR2B | 0.958747 |  |  |  |  |  |
| PTPRC | 0.027983 |  |  |  |  |  |
| HLA-E | 0.173361 |  |  |  |  |  |
| SLFN5 | 0.999634 |  |  |  |  |  |
| SPOCK2 | 0.000396 |  |  |  |  |  |
| ITGAX | 0.079689 |  |  |  |  |  |
| IGSF6 | 0.623459 |  |  |  |  |  |
| PNRC1 | 0.0229 |  |  |  |  |  |
| BCL2A1 | 0.225998 |  |  |  |  |  |
| SERPINF1 | 0.565356 |  |  |  |  |  |
| IGKC | 0.022019 |  |  |  |  |  |
| PPDPF | 0.110594 |  |  |  |  |  |
| EMB | 0.005415 |  |  |  |  |  |
| TXN | 0.046363 |  |  |  |  |  |
| SARAF | 0.59903 |  |  |  |  |  |
| PLBD1 | 0.245619 |  |  |  |  |  |
| RASSF4 | 0.888828 |  |  |  |  |  |
| CTSZ | 0.631525 |  |  |  |  |  |
| GNG5 | 0.177434 |  |  |  |  |  |
| LY6E | 0.584642 |  |  |  |  |  |
| BIRC3 | 0.000878 |  |  |  |  |  |
| FYN | 0.053709 |  |  |  |  |  |
| HMGA1 | 0.260834 |  |  |  |  |  |
| FBP1 | 0.088809 |  |  |  |  |  |
| HLA-DPB1 | 0.009894 |  |  |  |  |  |
| CD7 | 0.056727 |  |  |  |  |  |
| RNASE6 | 0.310882 |  |  |  |  |  |
| SAMHD1 | 0.690437 |  |  |  |  |  |
| FCN1 | 0.373072 |  |  |  |  |  |
| CALHM6 | 0.06677 |  |  |  |  |  |
| NAP1L1 | 0.748071 |  |  |  |  |  |
| PLP2 | 0.655022 |  |  |  |  |  |
| SP100 | 0.014624 |  |  |  |  |  |
| CD247 | 0.001209 |  |  |  |  |  |
| NAAA | 0.535157 |  |  |  |  |  |
| JAML | 0.003305 |  |  |  |  |  |
| SRSF7 | 0.734593 |  |  |  |  |  |
| KCNK6 | 0.73642 |  |  |  |  |  |
| GSTP1 | 0.984154 |  |  |  |  |  |
| SUPT4H1 | 0.417859 |  |  |  |  |  |
| HIST1H4C | 0.804043 |  |  |  |  |  |
| AP2S1 | 0.430579 |  |  |  |  |  |
| CFP | 0.168505 |  |  |  |  |  |
| CLEC10A | 0.014786 |  |  |  |  |  |
| TUBA1A | 0.958587 |  |  |  |  |  |
| GIMAP4 | 0.076418 |  |  |  |  |  |
| CIITA | 0.045669 |  |  |  |  |  |
| ASAP1 | 0.515062 |  |  |  |  |  |
| PSAP | 0.052409 |  |  |  |  |  |
| RABAC1 | 0.855261 |  |  |  |  |  |
| LTB | 0.030307 |  |  |  |  |  |
| ITM2A | 0.13185 |  |  |  |  |  |
| PPP3CC | 0.283905 |  |  |  |  |  |
| WIPF1 | 0.046383 |  |  |  |  |  |
| IL32 | 0.306489 |  |  |  |  |  |
| FGL2 | 0.113858 |  |  |  |  |  |
| KLF4 | 0.500826 |  |  |  |  |  |
| PLAUR | 0.2146 |  |  |  |  |  |
| IFITM3 | 0.195779 |  |  |  |  |  |
| SMCO4 | 0.969729 |  |  |  |  |  |
| PLEK | 0.384813 |  |  |  |  |  |
| CEBPD | 0.000423 |  |  |  |  |  |
| CPVL | 0.143534 |  |  |  |  |  |
| GNG2 | 0.120981 |  |  |  |  |  |

| **Table S4. The genes associated with prognosis based on METABRIC database** | | | | | | |
| --- | --- | --- | --- | --- | --- | --- |
| gene | pvalue |  |  |  |  |  |
| AAK1 | 0.001252 |  |  |  |  |  |
| ACAP1 | 0.254993 |  |  |  |  |  |
| ACTB | 0.203242 |  |  |  |  |  |
| ACTG1 | 0.652347 |  |  |  |  |  |
| AES | 0.133676 |  |  |  |  |  |
| AHR | 0.083008 |  |  |  |  |  |
| AIF1 | 0.207245 |  |  |  |  |  |
| ALDH2 | 0.008104 |  |  |  |  |  |
| ALOX5 | 0.439058 |  |  |  |  |  |
| ALOX5AP | 0.012868 |  |  |  |  |  |
| ANAPC16 | 0.000105 |  |  |  |  |  |
| ANKRD12 | 2.46E-06 |  |  |  |  |  |
| ANXA2 | 0.116785 |  |  |  |  |  |
| ANXA5 | 0.044974 |  |  |  |  |  |
| AP1S2 | 0.023608 |  |  |  |  |  |
| AP2S1 | 0.476389 |  |  |  |  |  |
| APOBEC3G | 0.113538 |  |  |  |  |  |
| APPL1 | 0.000878 |  |  |  |  |  |
| ARF5 | 0.432658 |  |  |  |  |  |
| ARHGAP15 | 0.000362 |  |  |  |  |  |
| ARHGAP9 | 0.035701 |  |  |  |  |  |
| ARHGEF1 | 0.924568 |  |  |  |  |  |
| ARPC3 | 0.060162 |  |  |  |  |  |
| ASAP1 | 0.052171 |  |  |  |  |  |
| ATF3 | 0.262138 |  |  |  |  |  |
| ATF5 | 0.403254 |  |  |  |  |  |
| ATG3 | 0.402903 |  |  |  |  |  |
| ATP2B1-AS1 | 0.439012 |  |  |  |  |  |
| B2M | 0.020021 |  |  |  |  |  |
| BASP1 | 0.46317 |  |  |  |  |  |
| BCL2A1 | 0.009657 |  |  |  |  |  |
| BID | 0.425293 |  |  |  |  |  |
| BIN2 | 0.155771 |  |  |  |  |  |
| BIRC3 | 0.052949 |  |  |  |  |  |
| BTG1 | 0.009074 |  |  |  |  |  |
| BTN3A2 | 0.227741 |  |  |  |  |  |
| BUB3 | 0.296592 |  |  |  |  |  |
| C12orf57 | 5.67E-08 |  |  |  |  |  |
| C15orf48 | 0.085393 |  |  |  |  |  |
| C19orf66 | 0.69676 |  |  |  |  |  |
| C1orf162 | 0.551306 |  |  |  |  |  |
| C1orf54 | 0.03333 |  |  |  |  |  |
| C20orf27 | 0.17657 |  |  |  |  |  |
| CALM1 | 0.039039 |  |  |  |  |  |
| CAPG | 0.276059 |  |  |  |  |  |
| CAT | 0.034887 |  |  |  |  |  |
| CCDC88A | 0.895089 |  |  |  |  |  |
| CCL4 | 0.06262 |  |  |  |  |  |
| CCL5 | 0.255683 |  |  |  |  |  |
| CCND3 | 0.650516 |  |  |  |  |  |
| CD1C | 1.67E-05 |  |  |  |  |  |
| CD1E | 0.457176 |  |  |  |  |  |
| CD2 | 0.128147 |  |  |  |  |  |
| CD247 | 0.331495 |  |  |  |  |  |
| CD27 | 0.006092 |  |  |  |  |  |
| CD33 | 0.333217 |  |  |  |  |  |
| CD3D | 0.030334 |  |  |  |  |  |
| CD3E | 0.084203 |  |  |  |  |  |
| CD3G | 0.201833 |  |  |  |  |  |
| CD40 | 0.722453 |  |  |  |  |  |
| CD52 | 0.033003 |  |  |  |  |  |
| CD6 | 0.093893 |  |  |  |  |  |
| CD68 | 0.002525 |  |  |  |  |  |
| CD69 | 0.001872 |  |  |  |  |  |
| CD7 | 0.884148 |  |  |  |  |  |
| CD74 | 0.026981 |  |  |  |  |  |
| CD82 | 0.75909 |  |  |  |  |  |
| CD83 | 0.849234 |  |  |  |  |  |
| CD86 | 0.350498 |  |  |  |  |  |
| CD8A | 0.016688 |  |  |  |  |  |
| CD99 | 0.361566 |  |  |  |  |  |
| CDKN1A | 0.664343 |  |  |  |  |  |
| CEBPD | 0.091239 |  |  |  |  |  |
| CFP | 0.013112 |  |  |  |  |  |
| CHMP1B | 0.402665 |  |  |  |  |  |
| CLEC10A | 1.51E-05 |  |  |  |  |  |
| CLEC2D | 0.079943 |  |  |  |  |  |
| CLEC4A | 0.034888 |  |  |  |  |  |
| CLEC7A | 0.137795 |  |  |  |  |  |
| CMTM6 | 0.044124 |  |  |  |  |  |
| CORO1A | 0.408805 |  |  |  |  |  |
| COTL1 | 0.365597 |  |  |  |  |  |
| CPVL | 0.028743 |  |  |  |  |  |
| CSF1R | 0.316621 |  |  |  |  |  |
| CSF2RA | 0.016937 |  |  |  |  |  |
| CSF3R | 0.605364 |  |  |  |  |  |
| CST3 | 0.019601 |  |  |  |  |  |
| CST7 | 0.33795 |  |  |  |  |  |
| CSTA | 0.511307 |  |  |  |  |  |
| CTSD | 0.253429 |  |  |  |  |  |
| CTSH | 0.06277 |  |  |  |  |  |
| CTSW | 0.010413 |  |  |  |  |  |
| CTSZ | 0.010055 |  |  |  |  |  |
| CUTA | 0.252912 |  |  |  |  |  |
| CXCL16 | 0.066276 |  |  |  |  |  |
| CXCR3 | 0.32388 |  |  |  |  |  |
| CXCR4 | 0.920839 |  |  |  |  |  |
| DAPP1 | 0.131569 |  |  |  |  |  |
| DBNL | 0.029019 |  |  |  |  |  |
| DDIT4 | 0.000602 |  |  |  |  |  |
| DDX24 | 0.893686 |  |  |  |  |  |
| DENND2D | 0.121363 |  |  |  |  |  |
| DNAJB1 | 0.411276 |  |  |  |  |  |
| DPYSL2 | 0.000409 |  |  |  |  |  |
| DSE | 0.019968 |  |  |  |  |  |
| EIF3L | 0.000832 |  |  |  |  |  |
| EIF4A2 | 0.007491 |  |  |  |  |  |
| EMB | 0.460433 |  |  |  |  |  |
| EML4 | 0.484376 |  |  |  |  |  |
| ETS1 | 0.001258 |  |  |  |  |  |
| ETV6 | 0.295011 |  |  |  |  |  |
| EVL | 0.070378 |  |  |  |  |  |
| EZR | 1.45E-11 |  |  |  |  |  |
| FAM49A | 0.996479 |  |  |  |  |  |
| FBP1 | 0.113391 |  |  |  |  |  |
| FCER1A | 8.57E-12 |  |  |  |  |  |
| FCER1G | 0.978417 |  |  |  |  |  |
| FCGR2B | 0.629694 |  |  |  |  |  |
| FCGRT | 0.743025 |  |  |  |  |  |
| FCN1 | 0.037112 |  |  |  |  |  |
| FGD2 | 0.830824 |  |  |  |  |  |
| FGL2 | 0.004913 |  |  |  |  |  |
| FGR | 0.157821 |  |  |  |  |  |
| FLT3 | 1.55E-11 |  |  |  |  |  |
| FOS | 0.001522 |  |  |  |  |  |
| FSCN1 | 0.885406 |  |  |  |  |  |
| FTH1 | 0.327946 |  |  |  |  |  |
| FUS | 0.023148 |  |  |  |  |  |
| FYN | 0.696106 |  |  |  |  |  |
| GABARAP | 0.000227 |  |  |  |  |  |
| GABARAPL2 | 0.233841 |  |  |  |  |  |
| GADD45B | 0.389099 |  |  |  |  |  |
| GBP5 | 0.059758 |  |  |  |  |  |
| GCA | 0.835917 |  |  |  |  |  |
| GDI2 | 0.112431 |  |  |  |  |  |
| GIMAP4 | 0.007266 |  |  |  |  |  |
| GIMAP7 | 0.010037 |  |  |  |  |  |
| GLIPR1 | 0.021798 |  |  |  |  |  |
| GNG2 | 0.000631 |  |  |  |  |  |
| GNG5 | 0.46118 |  |  |  |  |  |
| GPX4 | 0.228876 |  |  |  |  |  |
| GRINA | 0.000135 |  |  |  |  |  |
| GRN | 0.353561 |  |  |  |  |  |
| GSN | 5.82E-05 |  |  |  |  |  |
| GSTP1 | 0.121455 |  |  |  |  |  |
| GYPC | 0.00188 |  |  |  |  |  |
| GZMA | 0.142329 |  |  |  |  |  |
| GZMK | 0.014806 |  |  |  |  |  |
| GZMM | 0.019238 |  |  |  |  |  |
| H2AFY | 0.317751 |  |  |  |  |  |
| HCST | 0.002567 |  |  |  |  |  |
| HIST1H4C | 0.000347 |  |  |  |  |  |
| HLA-A | 0.546934 |  |  |  |  |  |
| HLA-B | 0.92686 |  |  |  |  |  |
| HLA-C | 0.443152 |  |  |  |  |  |
| HLA-DMA | 0.399929 |  |  |  |  |  |
| HLA-DMB | 0.113499 |  |  |  |  |  |
| HLA-DOA | 0.025784 |  |  |  |  |  |
| HLA-DPA1 | 0.012425 |  |  |  |  |  |
| HLA-DPB1 | 0.022564 |  |  |  |  |  |
| HLA-DQA1 | 0.254109 |  |  |  |  |  |
| HLA-DQA2 | 0.762025 |  |  |  |  |  |
| HLA-DQB1 | 0.105792 |  |  |  |  |  |
| HLA-DRA | 0.05727 |  |  |  |  |  |
| HLA-DRB1 | 0.457139 |  |  |  |  |  |
| HLA-E | 0.099462 |  |  |  |  |  |
| HMGA1 | 1.20E-05 |  |  |  |  |  |
| ICAM1 | 0.534202 |  |  |  |  |  |
| ICAM3 | 0.011166 |  |  |  |  |  |
| IER3 | 0.02231 |  |  |  |  |  |
| IFI30 | 0.001369 |  |  |  |  |  |
| IFI44L | 0.062381 |  |  |  |  |  |
| IFI6 | 0.001356 |  |  |  |  |  |
| IFITM1 | 0.28549 |  |  |  |  |  |
| IFITM3 | 0.907684 |  |  |  |  |  |
| IGKC | 0.000904 |  |  |  |  |  |
| IGSF6 | 0.441242 |  |  |  |  |  |
| IKZF3 | 0.164973 |  |  |  |  |  |
| IL13RA1 | 0.544259 |  |  |  |  |  |
| IL1B | 0.058524 |  |  |  |  |  |
| IL2RG | 0.08716 |  |  |  |  |  |
| IL32 | 0.911192 |  |  |  |  |  |
| IL7R | 0.000427 |  |  |  |  |  |
| IRF8 | 0.01269 |  |  |  |  |  |
| ISG15 | 0.022954 |  |  |  |  |  |
| ISG20 | 0.894296 |  |  |  |  |  |
| ITGAX | 0.318053 |  |  |  |  |  |
| ITGB2 | 0.621092 |  |  |  |  |  |
| ITM2A | 3.89E-08 |  |  |  |  |  |
| JUN | 0.013495 |  |  |  |  |  |
| KCTD12 | 0.918468 |  |  |  |  |  |
| KDM2B | 0.806868 |  |  |  |  |  |
| KLF4 | 0.029097 |  |  |  |  |  |
| KRT10 | 0.535106 |  |  |  |  |  |
| LAMP1 | 0.362751 |  |  |  |  |  |
| LAMTOR1 | 0.047719 |  |  |  |  |  |
| LAMTOR2 | 0.129172 |  |  |  |  |  |
| LAP3 | 0.202253 |  |  |  |  |  |
| LAT | 0.515946 |  |  |  |  |  |
| LBH | 0.069675 |  |  |  |  |  |
| LCK | 0.159612 |  |  |  |  |  |
| LCP2 | 0.339722 |  |  |  |  |  |
| LEPROTL1 | 0.00248 |  |  |  |  |  |
| LGALS1 | 0.173772 |  |  |  |  |  |
| LGALS2 | 2.37E-05 |  |  |  |  |  |
| LGALS9 | 0.002786 |  |  |  |  |  |
| LITAF | 0.125595 |  |  |  |  |  |
| LMNA | 0.45022 |  |  |  |  |  |
| LSP1 | 0.222213 |  |  |  |  |  |
| LST1 | 0.394326 |  |  |  |  |  |
| LTA4H | 0.219108 |  |  |  |  |  |
| LTB | 0.056185 |  |  |  |  |  |
| LY6E | 0.000301 |  |  |  |  |  |
| LY86 | 0.374819 |  |  |  |  |  |
| LYN | 0.077663 |  |  |  |  |  |
| LYZ | 0.19126 |  |  |  |  |  |
| MAN2B1 | 0.019283 |  |  |  |  |  |
| MARCKSL1 | 0.257769 |  |  |  |  |  |
| MEF2C | 0.348987 |  |  |  |  |  |
| MFSD1 | 0.663716 |  |  |  |  |  |
| MGST2 | 0.461634 |  |  |  |  |  |
| MNDA | 0.953577 |  |  |  |  |  |
| MPEG1 | 0.039336 |  |  |  |  |  |
| MS4A6A | 0.205118 |  |  |  |  |  |
| MT1X | 0.042429 |  |  |  |  |  |
| MT2A | 0.29756 |  |  |  |  |  |
| MYD88 | 0.822535 |  |  |  |  |  |
| NAAA | 0.808314 |  |  |  |  |  |
| NAGA | 0.085641 |  |  |  |  |  |
| NAGK | 0.359759 |  |  |  |  |  |
| NAIP | 0.283591 |  |  |  |  |  |
| NAP1L1 | 0.249156 |  |  |  |  |  |
| NAPSA | 0.001442 |  |  |  |  |  |
| NDRG2 | 0.003323 |  |  |  |  |  |
| NET1 | 0.902884 |  |  |  |  |  |
| NFKBIA | 0.155023 |  |  |  |  |  |
| NKG7 | 0.794736 |  |  |  |  |  |
| NPC2 | 0.005811 |  |  |  |  |  |
| NR4A3 | 0.925947 |  |  |  |  |  |
| NUB1 | 0.102873 |  |  |  |  |  |
| OCIAD2 | 0.431996 |  |  |  |  |  |
| OPTN | 4.11E-05 |  |  |  |  |  |
| P2RY13 | 0.07322 |  |  |  |  |  |
| P2RY6 | 0.051576 |  |  |  |  |  |
| PABPC1 | 0.525764 |  |  |  |  |  |
| PAK1 | 0.569072 |  |  |  |  |  |
| PARP8 | 0.459572 |  |  |  |  |  |
| PDCD4 | 0.000255 |  |  |  |  |  |
| PEA15 | 0.446334 |  |  |  |  |  |
| PGLS | 0.785407 |  |  |  |  |  |
| PHACTR1 | 0.859933 |  |  |  |  |  |
| PHF1 | 0.063162 |  |  |  |  |  |
| PILRA | 0.001753 |  |  |  |  |  |
| PIM1 | 0.000398 |  |  |  |  |  |
| PIM2 | 0.030103 |  |  |  |  |  |
| PKIB | 0.064212 |  |  |  |  |  |
| PLAUR | 0.098427 |  |  |  |  |  |
| PLBD1 | 0.098555 |  |  |  |  |  |
| PLD4 | 0.978603 |  |  |  |  |  |
| PLEK | 0.316774 |  |  |  |  |  |
| PLEKHO1 | 0.938401 |  |  |  |  |  |
| PLP2 | 0.044208 |  |  |  |  |  |
| PLXDC2 | 0.131596 |  |  |  |  |  |
| PNRC1 | 0.608162 |  |  |  |  |  |
| PPA1 | 0.021858 |  |  |  |  |  |
| PPDPF | 3.49E-07 |  |  |  |  |  |
| PPP2R5C | 0.020346 |  |  |  |  |  |
| PPP3CC | 0.005349 |  |  |  |  |  |
| PPT1 | 0.743146 |  |  |  |  |  |
| PRCP | 0.038683 |  |  |  |  |  |
| PRKCH | 0.234324 |  |  |  |  |  |
| PSAP | 0.102908 |  |  |  |  |  |
| PSME2 | 0.6175 |  |  |  |  |  |
| PTAFR | 0.171472 |  |  |  |  |  |
| PTPN7 | 0.937976 |  |  |  |  |  |
| PTPRC | 0.36934 |  |  |  |  |  |
| PTPRCAP | 0.393867 |  |  |  |  |  |
| PTPRE | 8.36E-06 |  |  |  |  |  |
| PYCARD | 0.079493 |  |  |  |  |  |
| RAB31 | 0.060425 |  |  |  |  |  |
| RAB32 | 0.026653 |  |  |  |  |  |
| RAB7A | 0.015628 |  |  |  |  |  |
| RABAC1 | 0.030684 |  |  |  |  |  |
| RAC1 | 0.516392 |  |  |  |  |  |
| RAC2 | 0.07747 |  |  |  |  |  |
| RARRES3 | 0.019862 |  |  |  |  |  |
| RASAL3 | 0.30784 |  |  |  |  |  |
| RASSF2 | 0.000758 |  |  |  |  |  |
| RASSF4 | 0.046047 |  |  |  |  |  |
| RBL2 | 0.650581 |  |  |  |  |  |
| RGS10 | 0.335437 |  |  |  |  |  |
| RGS18 | 0.000766 |  |  |  |  |  |
| RGS2 | 0.0733 |  |  |  |  |  |
| RHOG | 0.33974 |  |  |  |  |  |
| RHOH | 0.911606 |  |  |  |  |  |
| RNASE6 | 0.191972 |  |  |  |  |  |
| RNF130 | 0.614003 |  |  |  |  |  |
| RNF213 | 1.71E-05 |  |  |  |  |  |
| RNH1 | 0.885335 |  |  |  |  |  |
| RPS24 | 0.004295 |  |  |  |  |  |
| RPS27 | 1.84E-07 |  |  |  |  |  |
| RPS29 | 0.001956 |  |  |  |  |  |
| S100A10 | 0.791194 |  |  |  |  |  |
| S100A11 | 0.002504 |  |  |  |  |  |
| S100A6 | 0.000915 |  |  |  |  |  |
| SAT1 | 0.180484 |  |  |  |  |  |
| SERPINA1 | 0.000287 |  |  |  |  |  |
| SERPINB1 | 0.00489 |  |  |  |  |  |
| SERPINF1 | 0.000458 |  |  |  |  |  |
| SERPINF2 | 4.88E-06 |  |  |  |  |  |
| SGK1 | 0.539858 |  |  |  |  |  |
| SH2D2A | 0.418149 |  |  |  |  |  |
| SHISA5 | 0.808585 |  |  |  |  |  |
| SIT1 | 0.016291 |  |  |  |  |  |
| SKAP1 | 0.025248 |  |  |  |  |  |
| SLC25A3 | 0.781945 |  |  |  |  |  |
| SLC25A5 | 0.101206 |  |  |  |  |  |
| SLC38A1 | 0.078426 |  |  |  |  |  |
| SLC8A1 | 0.964217 |  |  |  |  |  |
| SLC9A3R1 | 0.04494 |  |  |  |  |  |
| SLFN5 | 0.755214 |  |  |  |  |  |
| SNX3 | 0.103145 |  |  |  |  |  |
| SOD1 | 0.049214 |  |  |  |  |  |
| SP100 | 0.054465 |  |  |  |  |  |
| SPCS2 | 0.777588 |  |  |  |  |  |
| SPI1 | 0.333365 |  |  |  |  |  |
| SPINT2 | 0.000996 |  |  |  |  |  |
| SPOCK2 | 0.429046 |  |  |  |  |  |
| SRSF7 | 0.000179 |  |  |  |  |  |
| STK17A | 0.365376 |  |  |  |  |  |
| SUN2 | 0.084761 |  |  |  |  |  |
| SUPT4H1 | 0.405449 |  |  |  |  |  |
| SYK | 0.335503 |  |  |  |  |  |
| SYNE2 | 0.4485 |  |  |  |  |  |
| SYNGR2 | 0.014264 |  |  |  |  |  |
| TAGLN2 | 0.017695 |  |  |  |  |  |
| TBC1D10C | 0.214281 |  |  |  |  |  |
| TC2N | 0.080971 |  |  |  |  |  |
| TECR | 0.870371 |  |  |  |  |  |
| TIMP1 | 0.952488 |  |  |  |  |  |
| TKT | 0.065606 |  |  |  |  |  |
| TMC8 | 0.013021 |  |  |  |  |  |
| TMEM14C | 1.10E-06 |  |  |  |  |  |
| TMEM176A | 0.066831 |  |  |  |  |  |
| TMEM176B | 0.118652 |  |  |  |  |  |
| TMSB10 | 0.050297 |  |  |  |  |  |
| TMSB4X | 0.057019 |  |  |  |  |  |
| TNFSF13 | 1.91E-06 |  |  |  |  |  |
| TNFSF13B | 0.2003 |  |  |  |  |  |
| TPST2 | 0.920362 |  |  |  |  |  |
| TRAC | 0.204575 |  |  |  |  |  |
| TRAF3IP3 | 0.020013 |  |  |  |  |  |
| TSC22D3 | 0.153981 |  |  |  |  |  |
| TUBA1A | 0.568807 |  |  |  |  |  |
| TUBA1B | 3.00E-05 |  |  |  |  |  |
| TUBA1C | 0.000123 |  |  |  |  |  |
| TUBA4A | 0.765929 |  |  |  |  |  |
| TXN | 0.788758 |  |  |  |  |  |
| TYMP | 0.02246 |  |  |  |  |  |
| TYROBP | 0.892186 |  |  |  |  |  |
| UBE2E2 | 0.02507 |  |  |  |  |  |
| UVRAG | 0.785523 |  |  |  |  |  |
| VAMP8 | 0.14744 |  |  |  |  |  |
| VIM | 0.005009 |  |  |  |  |  |
| WARS | 0.000186 |  |  |  |  |  |
| WIPF1 | 0.000637 |  |  |  |  |  |
| XBP1 | 0.318442 |  |  |  |  |  |
| YBX1 | 0.179741 |  |  |  |  |  |
| YWHAH | 0.0766 |  |  |  |  |  |
| ZAP70 | 0.022206 |  |  |  |  |  |
| ZC3HAV1 | 0.67676 |  |  |  |  |  |
| ZFP36 | 0.067917 |  |  |  |  |  |
| ZFP36L2 | 0.004566 |  |  |  |  |  |
| ZNF385A | 0.229111 |  |  |  |  |  |
| ZYX | 0.325262 |  |  |  |  |  |

| **Table S5. Overlaping genes** | |
| --- | --- |
| CD52 | 2.02E-05 |
| CD3D | 0.000448234 |
| BTG1 | 0.000466215 |
| SERPINA1 | 0.000826274 |
| CTSW | 0.000881728 |
| SKAP1 | 0.001645124 |
| CD74 | 0.002873488 |
| RPS29 | 0.002903204 |
| LGALS2 | 0.003918265 |
| TUBA1C | 0.004069007 |
| TRAF3IP3 | 0.00541869 |
| ZAP70 | 0.005725055 |
| GZMM | 0.006943713 |
| GIMAP7 | 0.007172571 |
| IL7R | 0.009142106 |
| RPS27 | 0.009502867 |
| RARRES3 | 0.009600163 |
| HLA-DPB1 | 0.009894207 |
| CD27 | 0.010004699 |
| ARHGAP9 | 0.01055793 |
| CD69 | 0.011063942 |
| TMC8 | 0.011226996 |
| FLT3 | 0.011256408 |
| IER3 | 0.013103027 |
| SIT1 | 0.01471299 |
| CLEC10A | 0.014786264 |
| CD1C | 0.015123009 |
| GZMK | 0.015533964 |
| HCST | 0.018032923 |
| NPC2 | 0.020038 |
| ETS1 | 0.020536635 |
| GLIPR1 | 0.021544882 |
| IGKC | 0.022019374 |
| SERPINF2 | 0.024172155 |
| HLA-DPA1 | 0.028737147 |
| ARHGAP15 | 0.029126653 |
| CD8A | 0.030019106 |
| GSN | 0.032862173 |
| RPS24 | 0.032878847 |
| ICAM3 | 0.036276888 |
| FCER1A | 0.041625063 |
| LGALS9 | 0.042764567 |
| JUN | 0.043895112 |
| TUBA1B | 0.044707134 |
| WIPF1 | 0.04638315 |
